# Supplementary material for: Unprecedented Biodegradable Cellulose-Derived Polyesters with Pendant Citronellol Moieties: From Monomer Synthesis to Enzymatic Degradation
Source: MDPI journal article supplement (doi:10.3390/molecules26247672), 2021-12-18
Supplement: s1 [file s1]

# Supporting Information

## Unprecedented biodegradable cellulose-derived polyesters having pendant citronellol moieties: from monomer synthesis to enzymatic degradation

Aihemaiti Kayishaer, Sami Fadlallah,\* Louis M. M. Mouterde,\* Aurélien A. M. Peru, Yasmine Werghi, Quentin Carboué, Michel Lopez, Florent Allais\*

URD Agro-Biotechnologies Industrielles (ABI), CEBB, AgroParisTech, 51110 Pomacle.

\* sami.fadlallah@agroparistech.fr, louis.mouterde@agroparistech.fr,  
florent.allais@agroparistech.fr

### Table of contents

|             |    |
|-------------|----|
| NMR .....   | 2  |
| LC-MS ..... | 16 |
| SEC.....    | 17 |
| FT-IR.....  | 21 |
| DSC .....   | 22 |
| TGA.....    | 24 |

**a. HBO-citro**

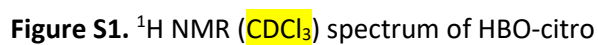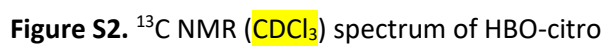

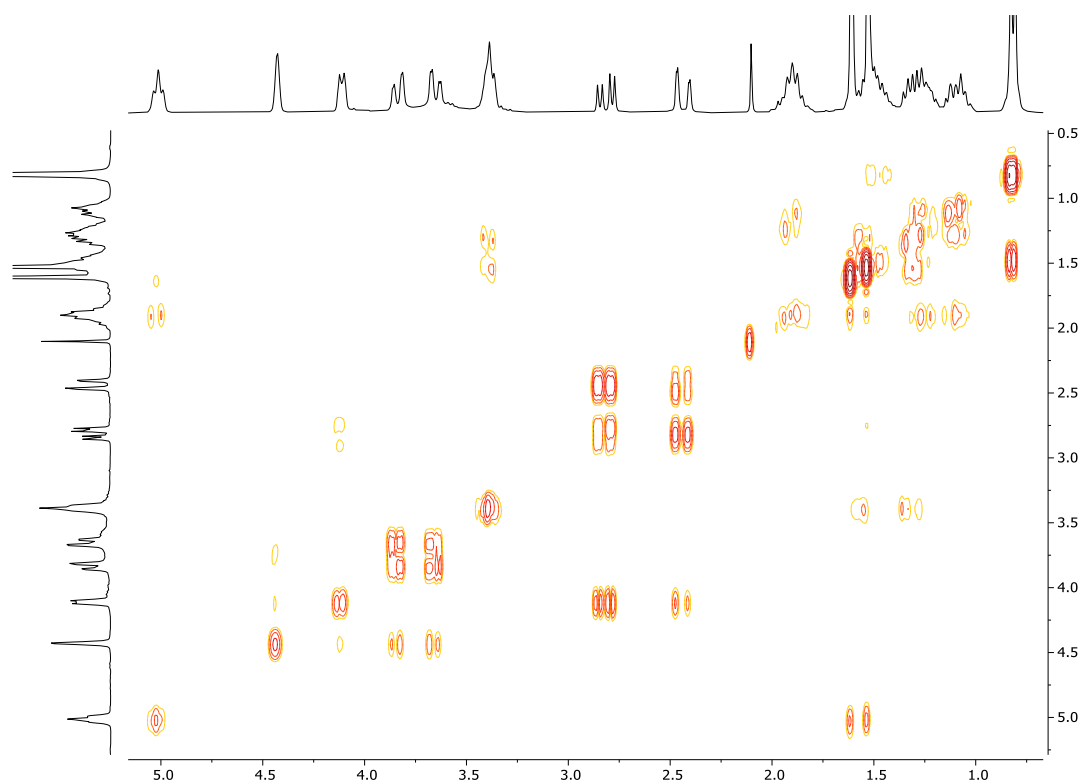

**Figure S3.**  $^1\text{H}$ - $^1\text{H}$  COSY ( $\text{CDCl}_3$ ) spectrum of HBO-citro

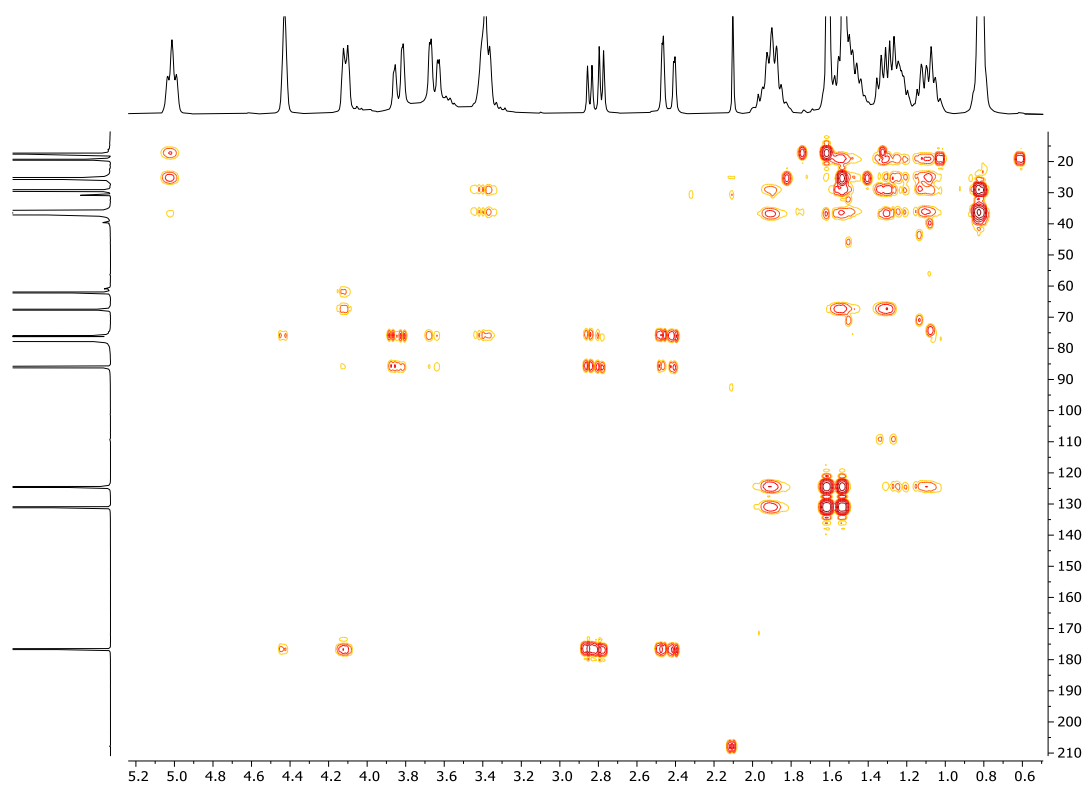

**Figure S4.**  $^1\text{H}$ - $^{13}\text{C}$  HMBC ( $\text{CDCl}_3$ ) spectrum of HBO-citro

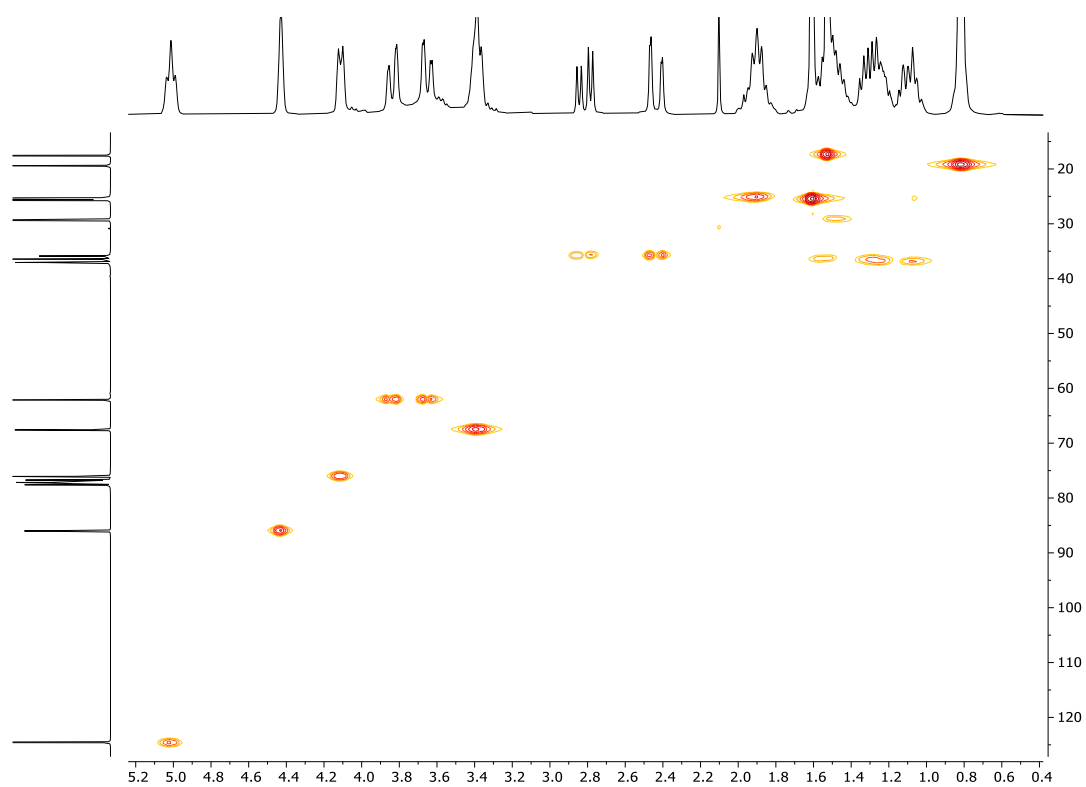

**Figure S5.**  $^1\text{H}$ - $^{13}\text{C}$  HSQC ( $\text{CDCl}_3$ ) spectrum of HBO-citro

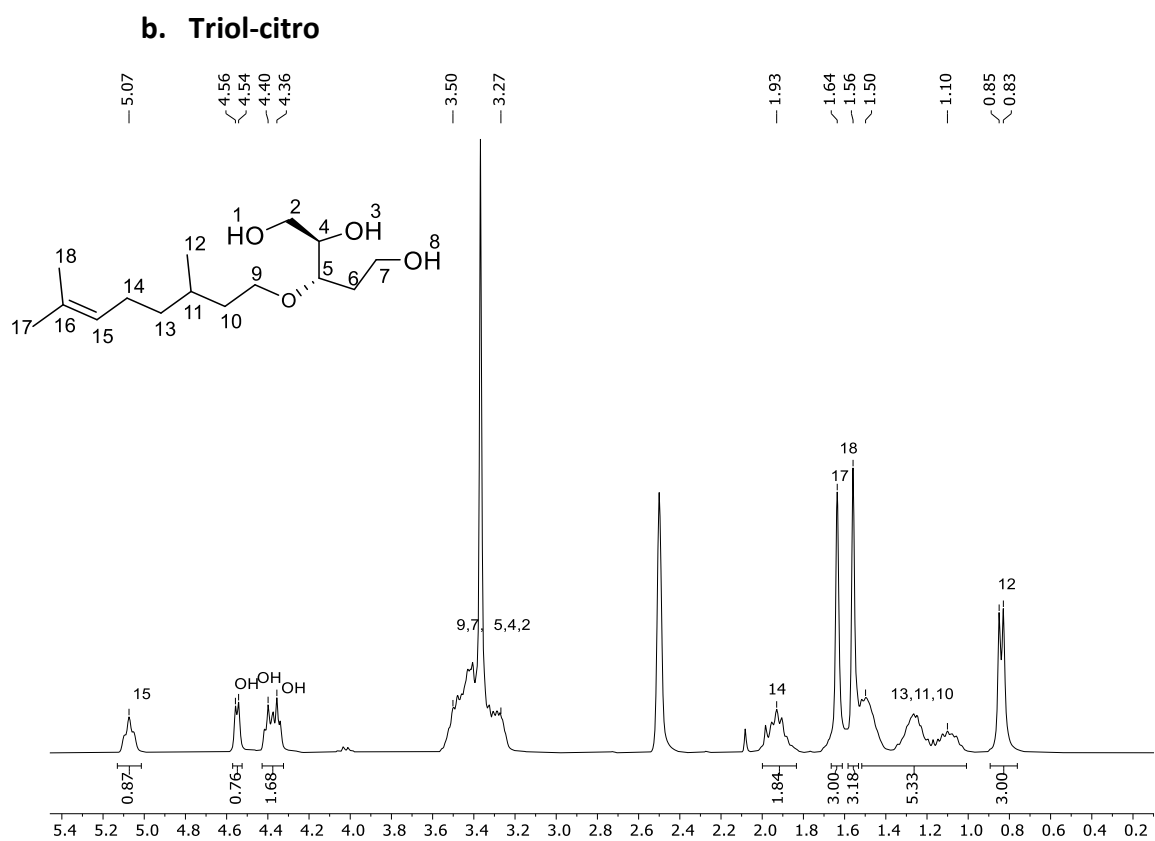

**Figure S6.**  $^1\text{H}$  NMR ( $\text{DMSO}-d_6$ ) spectrum of Triol-citro

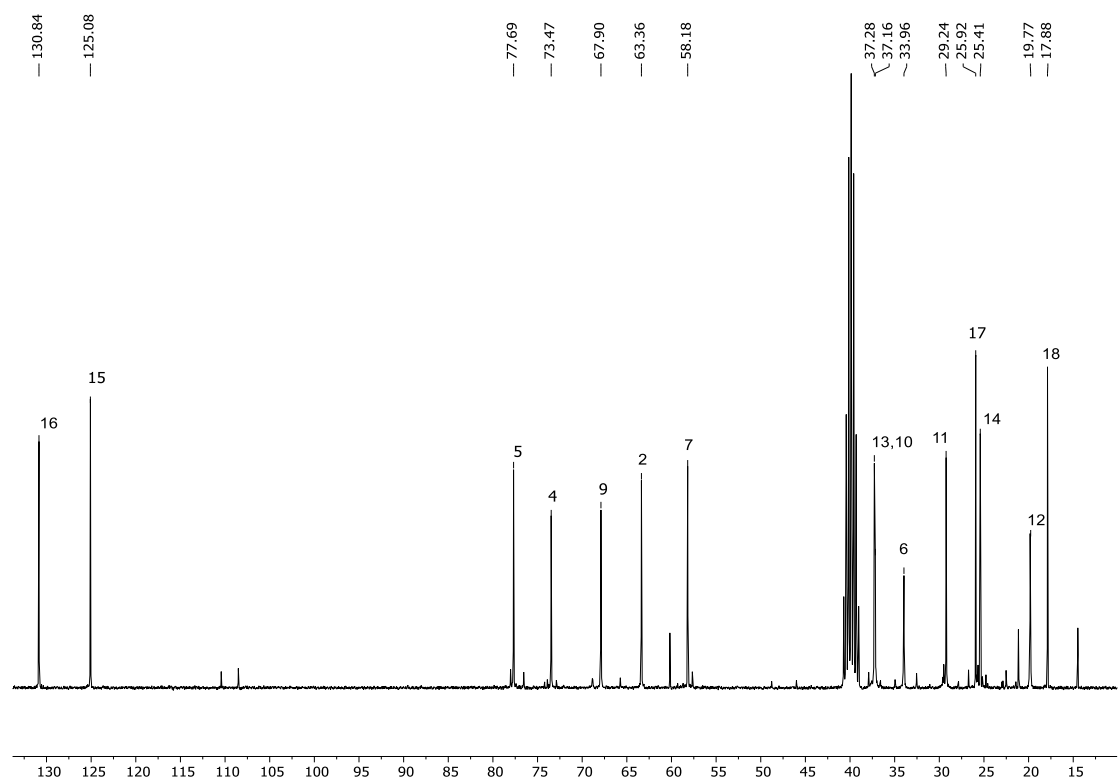

**Figure S7.**  $^{13}\text{C}$  NMR ( $\text{DMSO}-d_6$ ) spectrum of Triol-citro

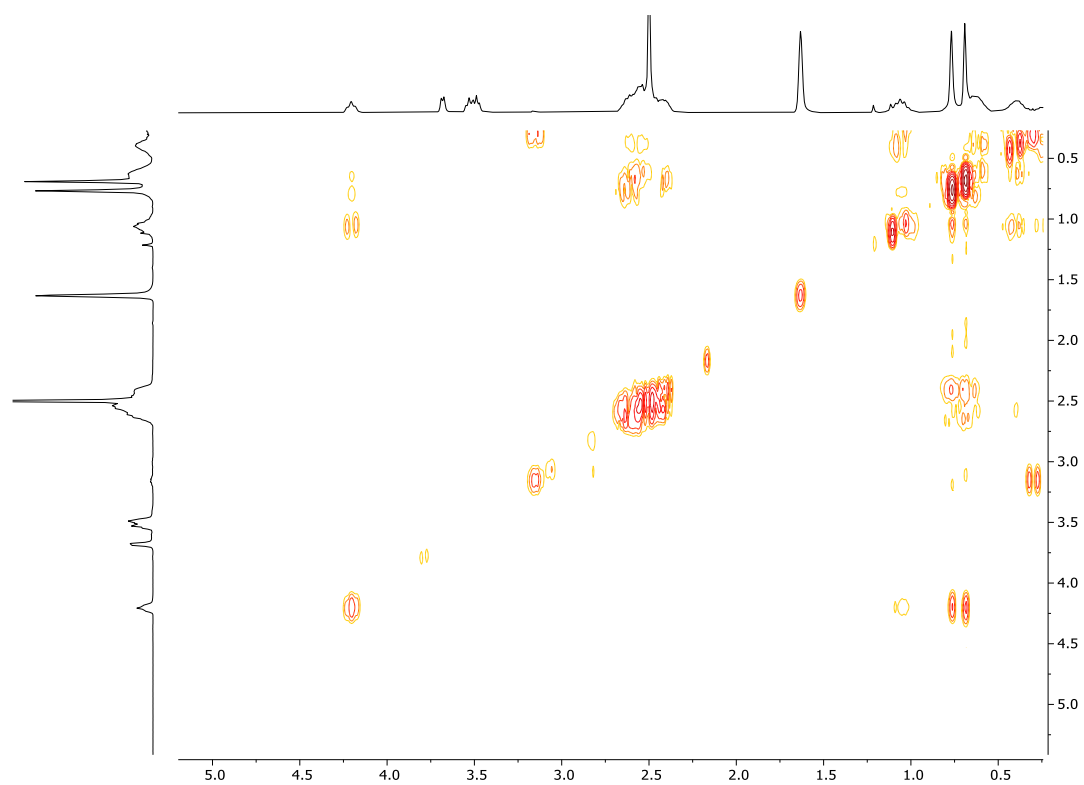

**Figure S8.**  $^1\text{H}$ - $^1\text{H}$  COSY (DMSO- $d_6$ ) spectrum of Triol-citro

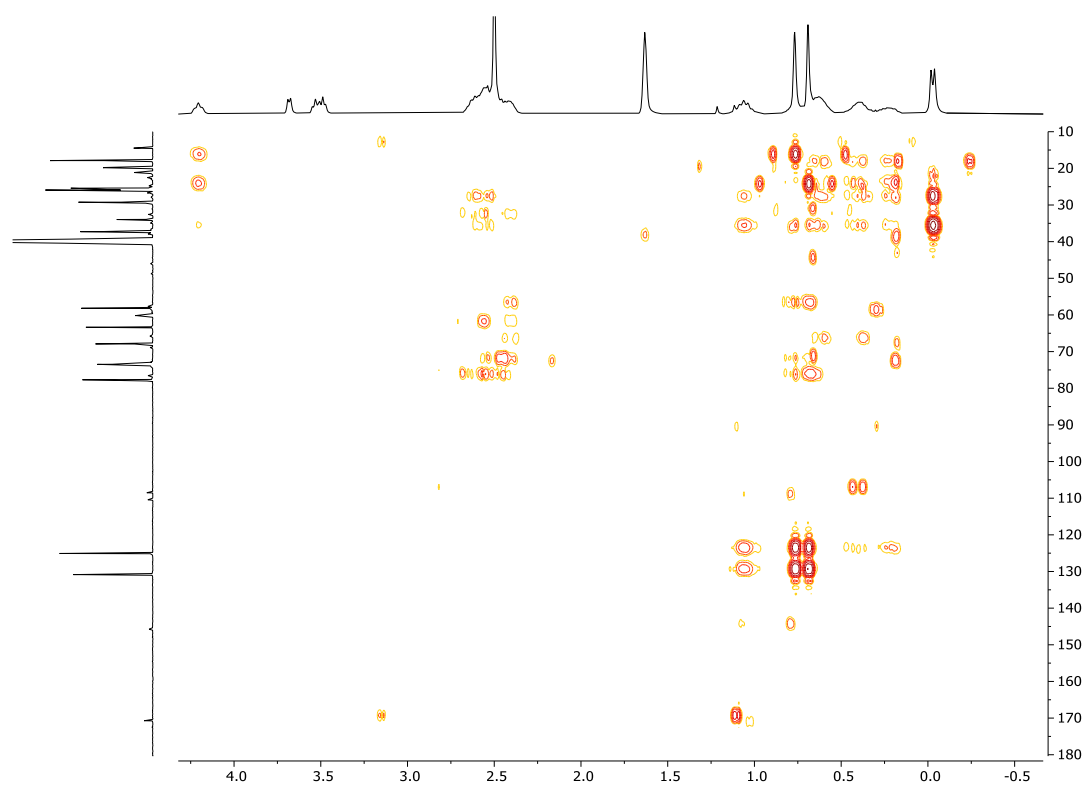

**Figure S9.**  $^1\text{H}$ - $^{13}\text{C}$  HMBC (DMSO- $d_6$ ) spectrum of Triol-citro

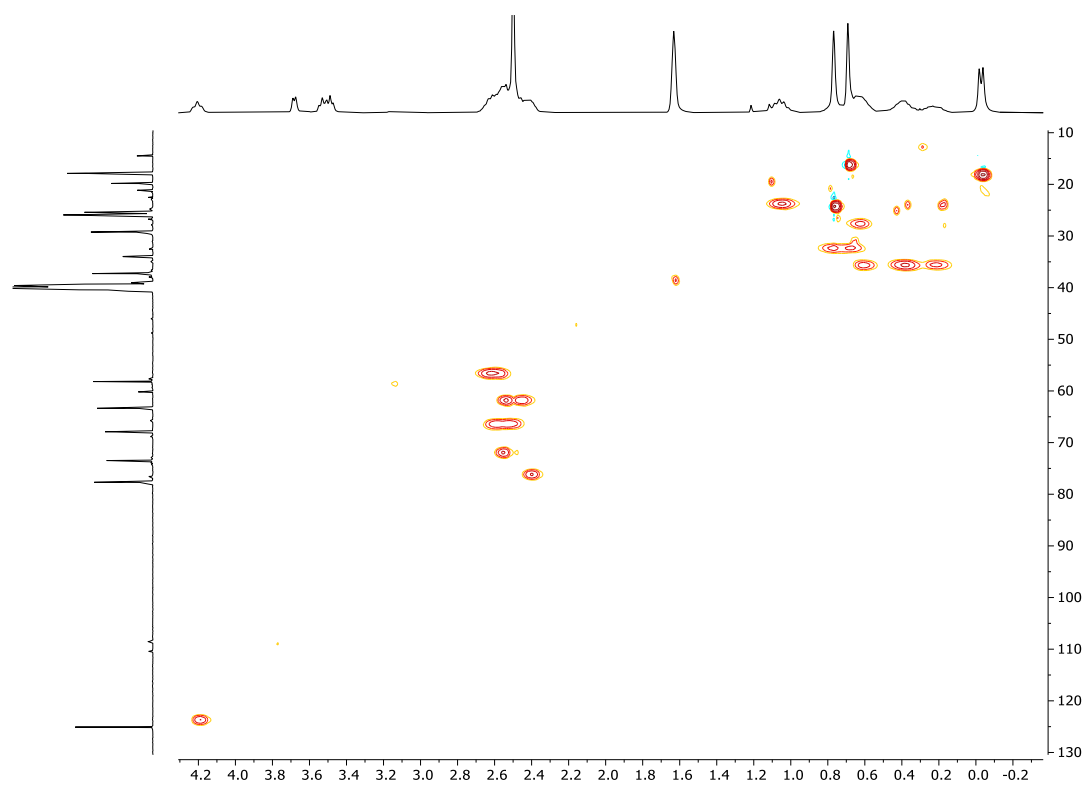

**Figure S10.**  $^1\text{H}$ - $^{13}\text{C}$  HSQC (DMSO- $d_6$ ) spectrum of Triol-citro

c. Lactol-citro mixture

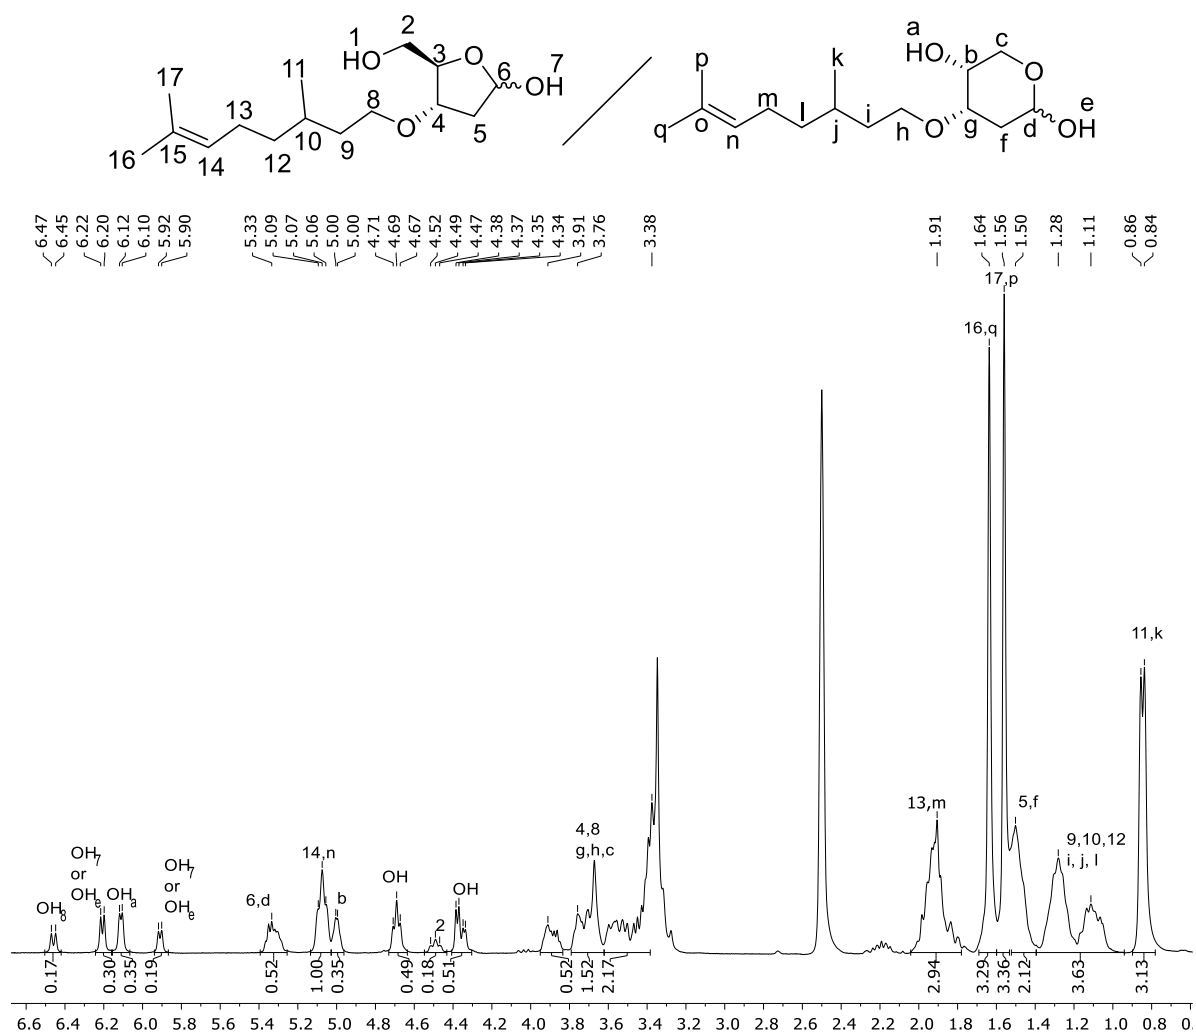

Figure S11.  $^1\text{H}$  NMR (DMSO- $d_6$ ) spectrum of Lactol-citro



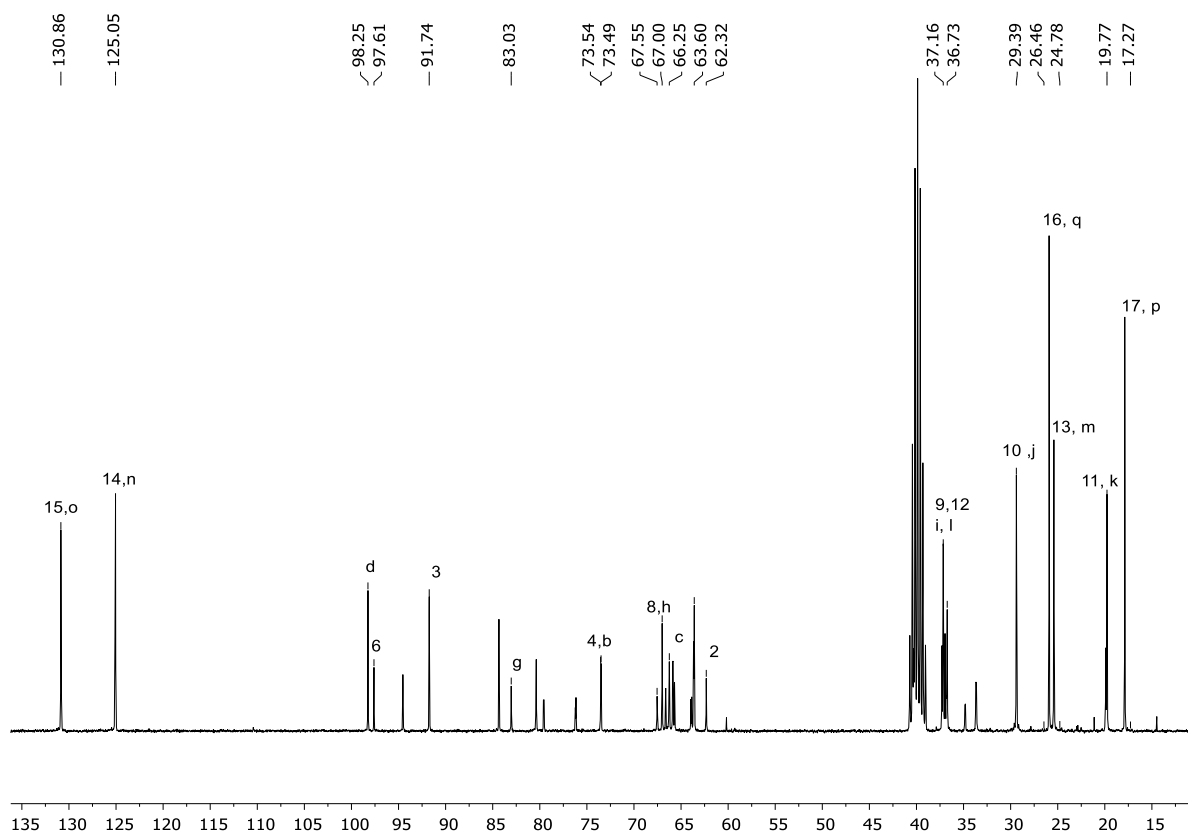

**Figure S12.**  $^{13}\text{C}$  NMR ( $\text{DMSO}-d_6$ ) spectrum of Lactol-citro

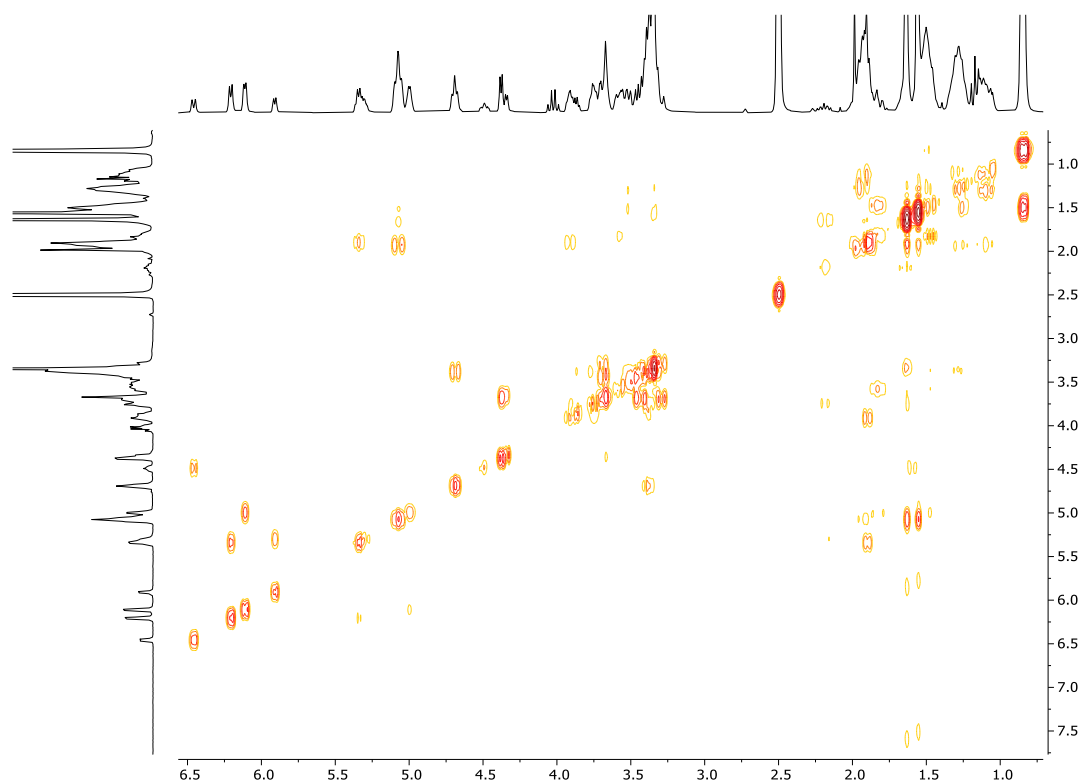

**Figure S13.**  $^1\text{H}-^1\text{H}$  COSY ( $\text{DMSO}-d_6$ ) spectrum of Lactol-citro

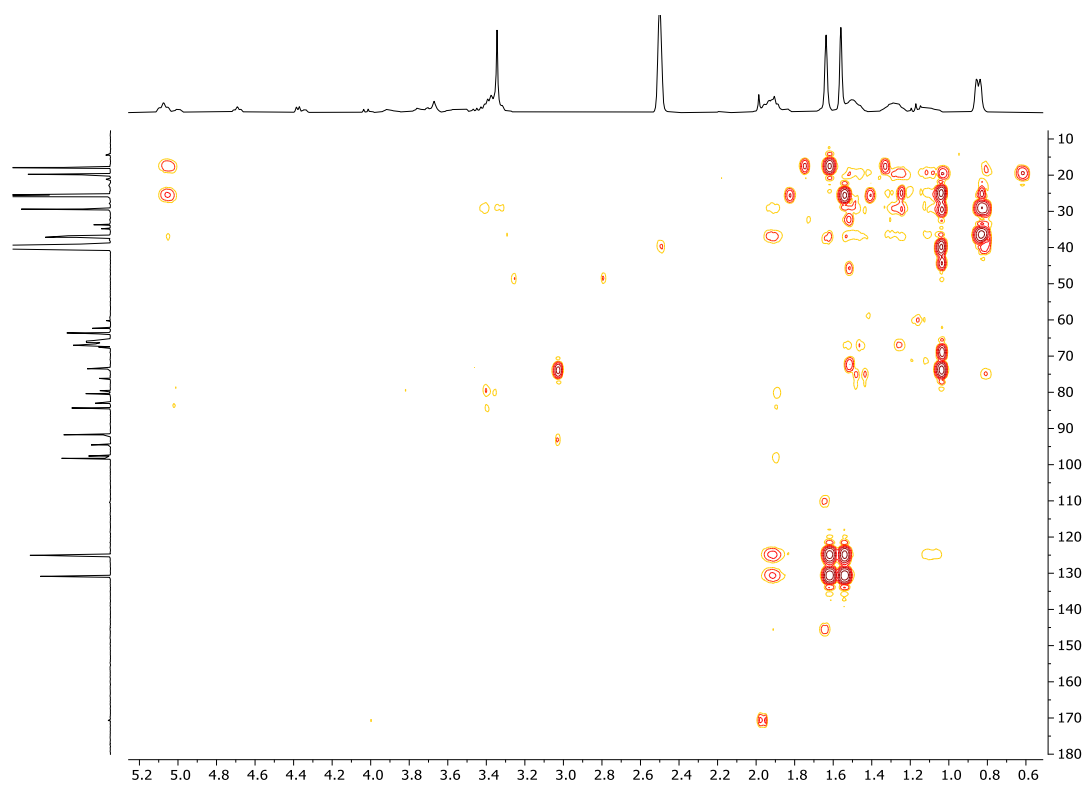

**Figure S14.**  $^1\text{H}$ - $^{13}\text{C}$  HMBC (DMSO- $d_6$ ) spectrum of Lactol-citro

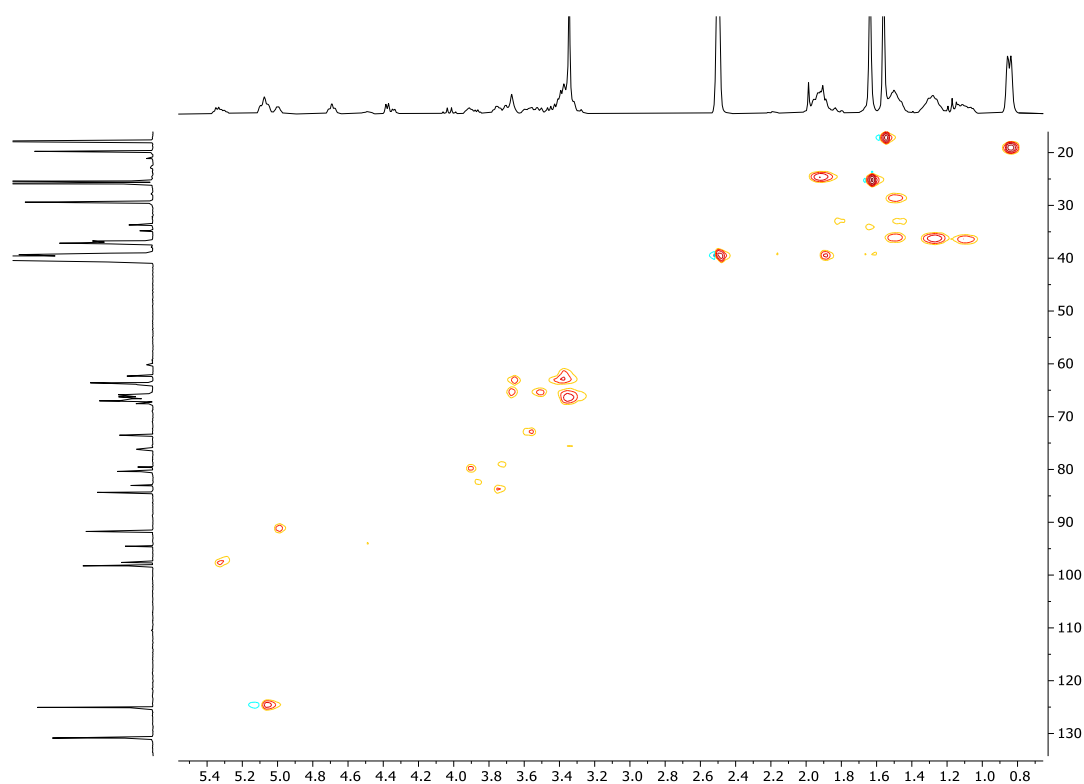

**Figure S15.**  $^1\text{H}$ - $^{13}\text{C}$  HSQC (DMSO- $d_6$ ) spectrum of Lactol-citro

d. P1

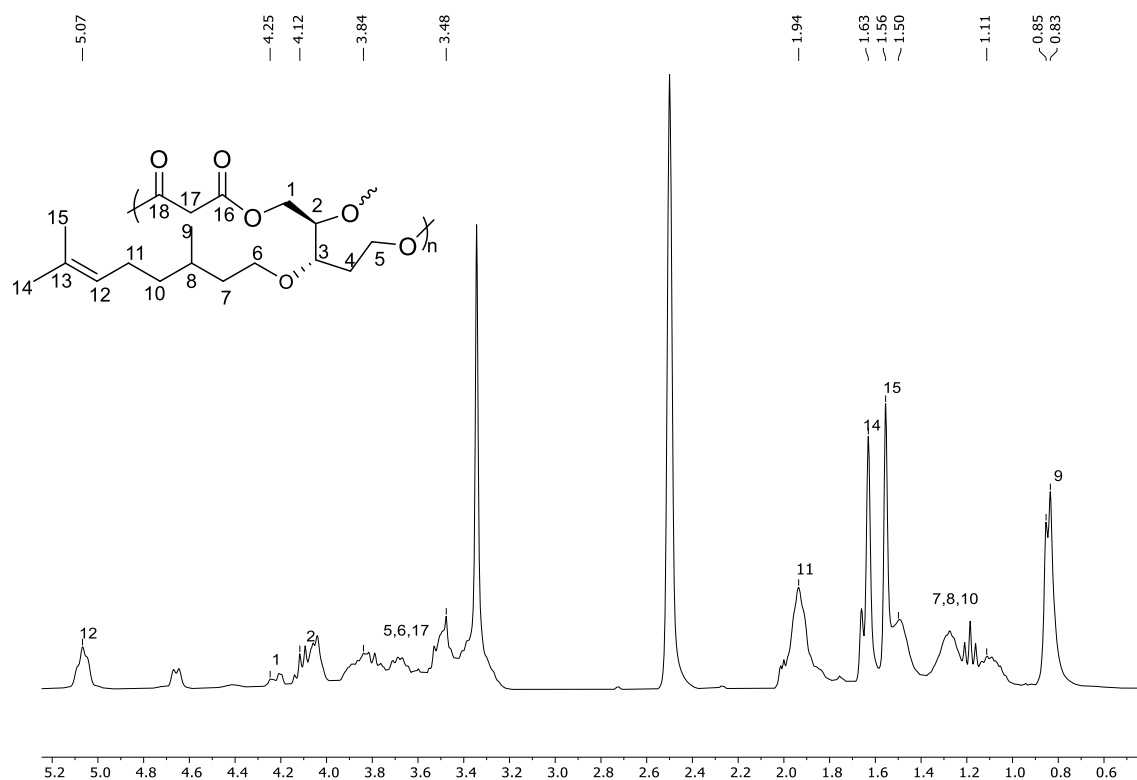

Figure S16. Typical  $^1\text{H}$  NMR (DMSO- $d_6$ ) spectrum of P1

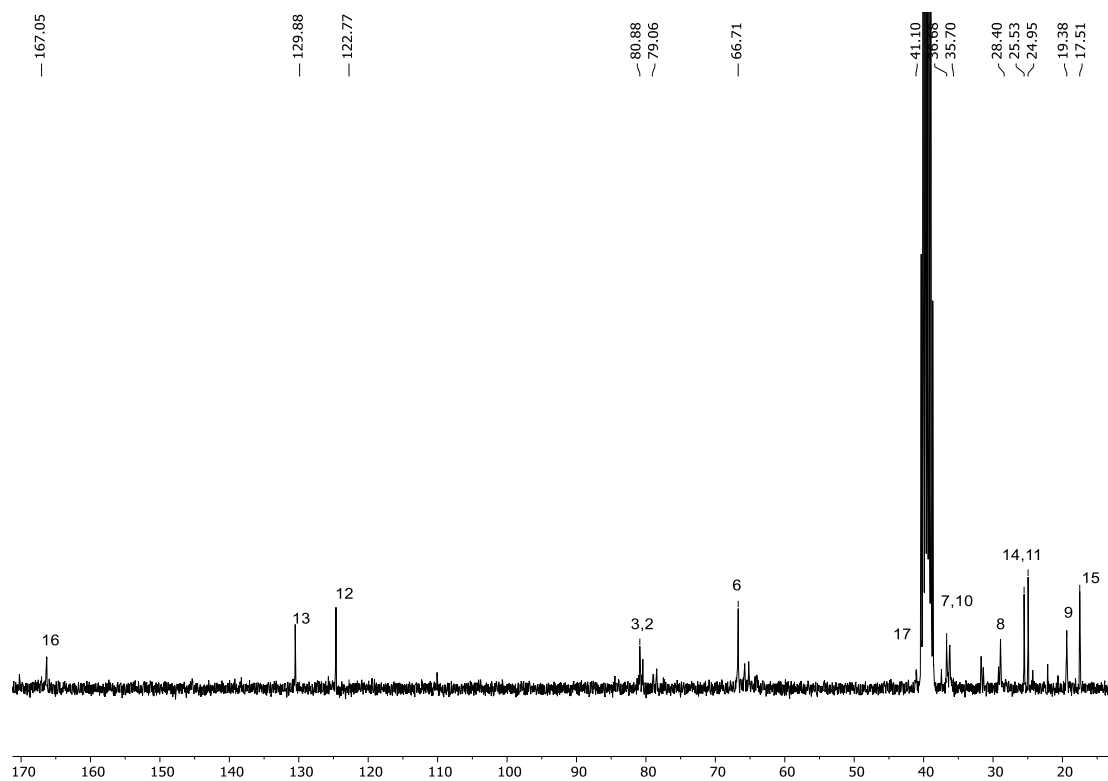

Figure S17. Typical  $^{13}\text{C}$  NMR (DMSO- $d_6$ ) spectrum of P1

e. P2

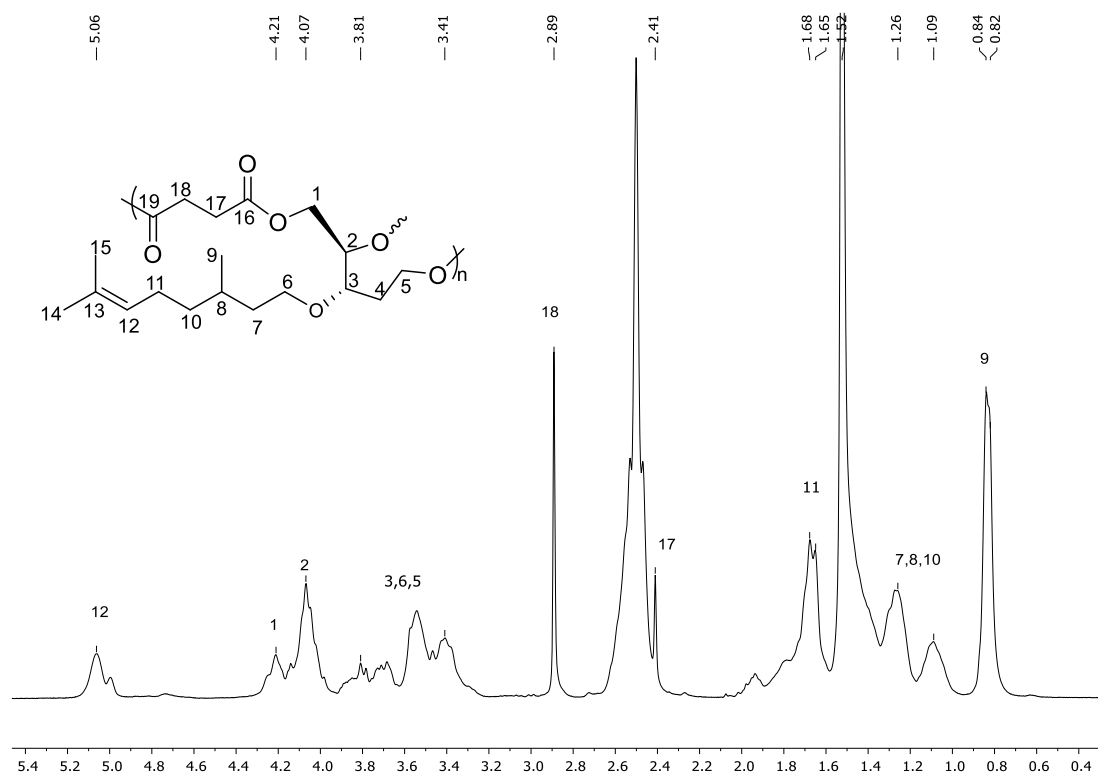

Figure S18. Typical  $^1\text{H}$  NMR (DMSO- $d_6$ ) spectrum of P2

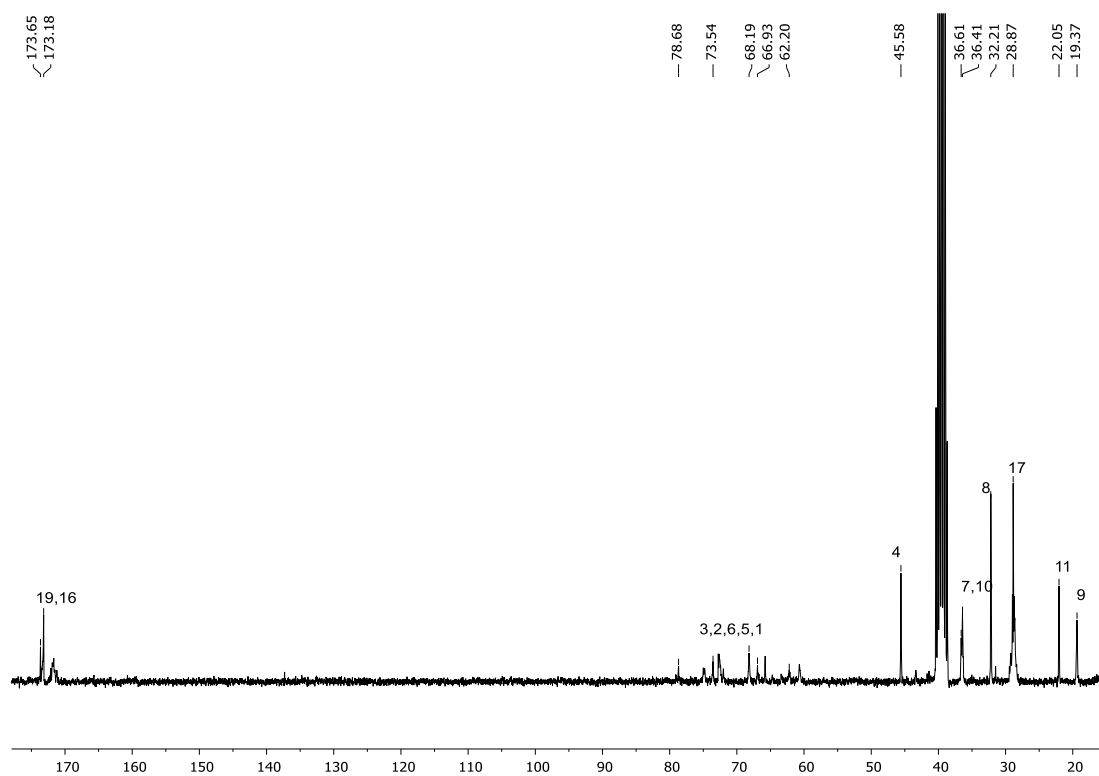

Figure S19. Typical  $^{13}\text{C}$  NMR (DMSO- $d_6$ ) spectrum of P2

**f. P3**

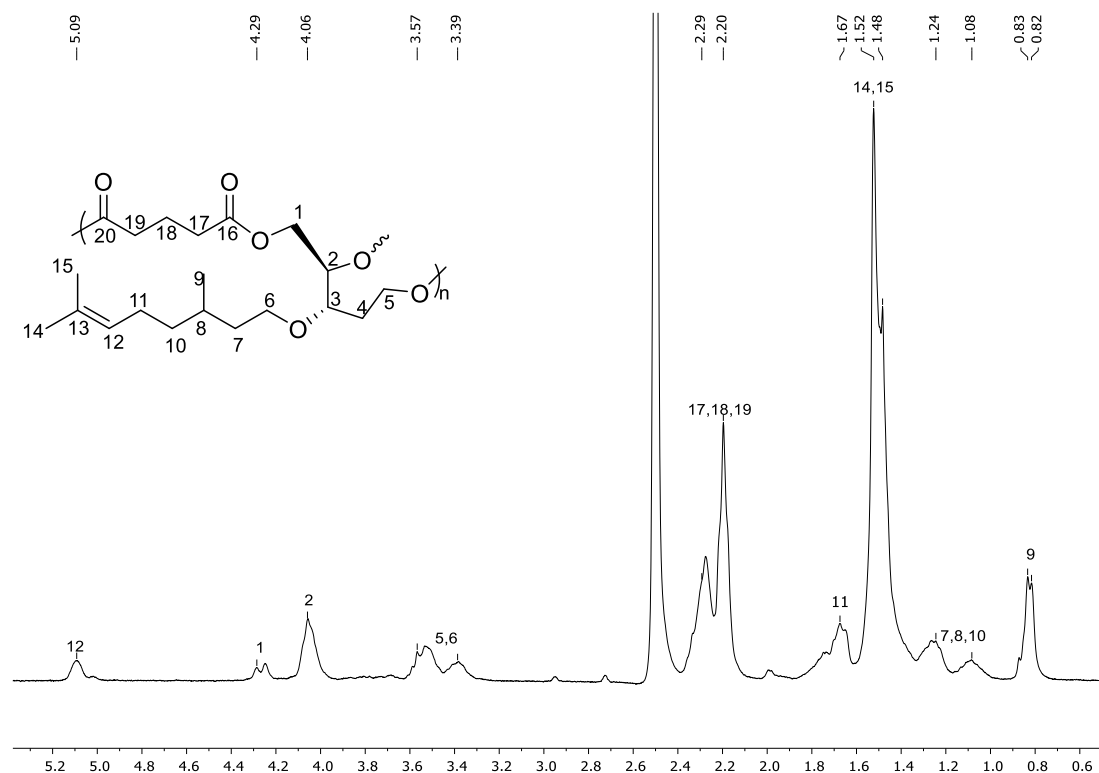

**Figure S20.** Typical  $^1\text{H}$  NMR (DMSO- $d_6$ ) spectrum of P3

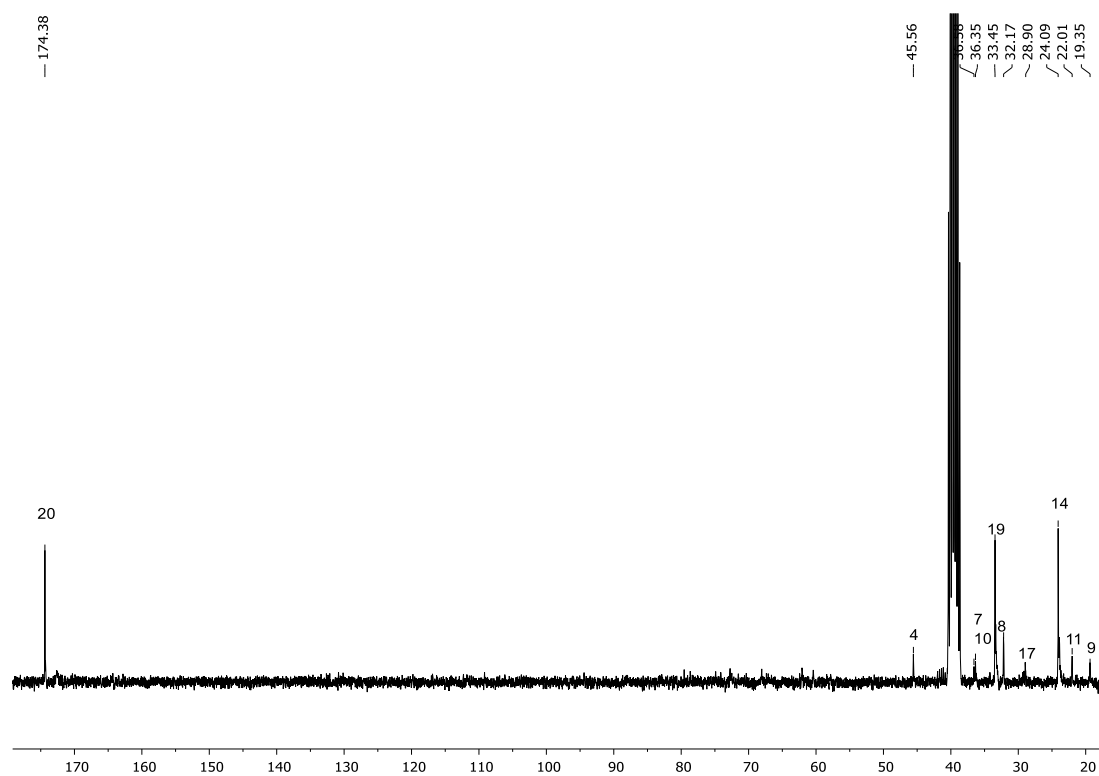

**Figure S21.** Typical  $^{13}\text{C}$  NMR (DMSO- $d_6$ ) spectrum of P3

**g. P4**

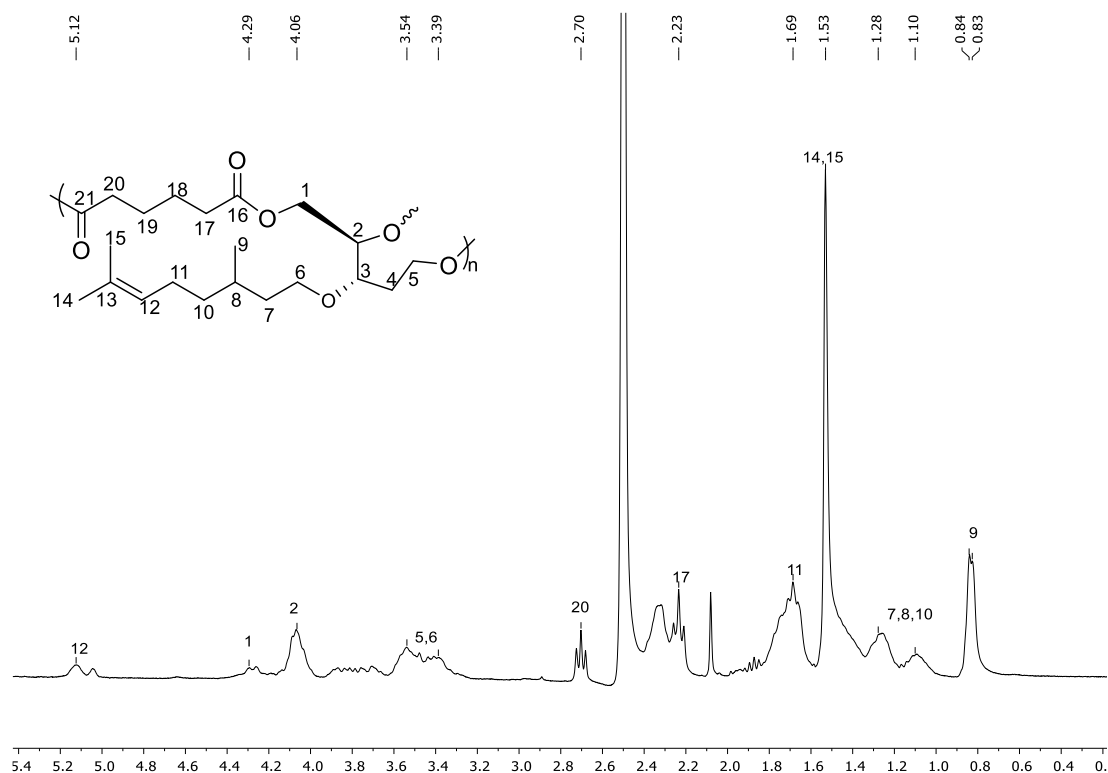

**Figure S22.** Typical  $^1\text{H}$  NMR (DMSO- $d_6$ ) spectrum of P4

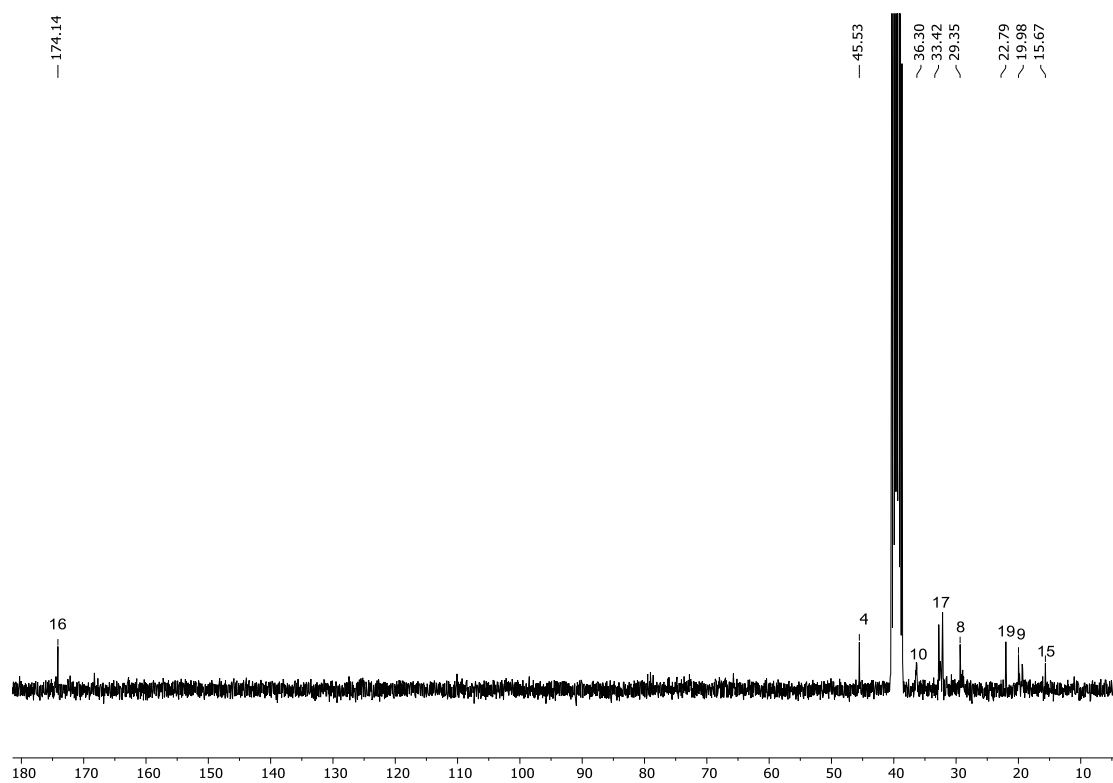

**Figure S23.** Typical  $^{13}\text{C}$  NMR (DMSO- $d_6$ ) spectrum of P4

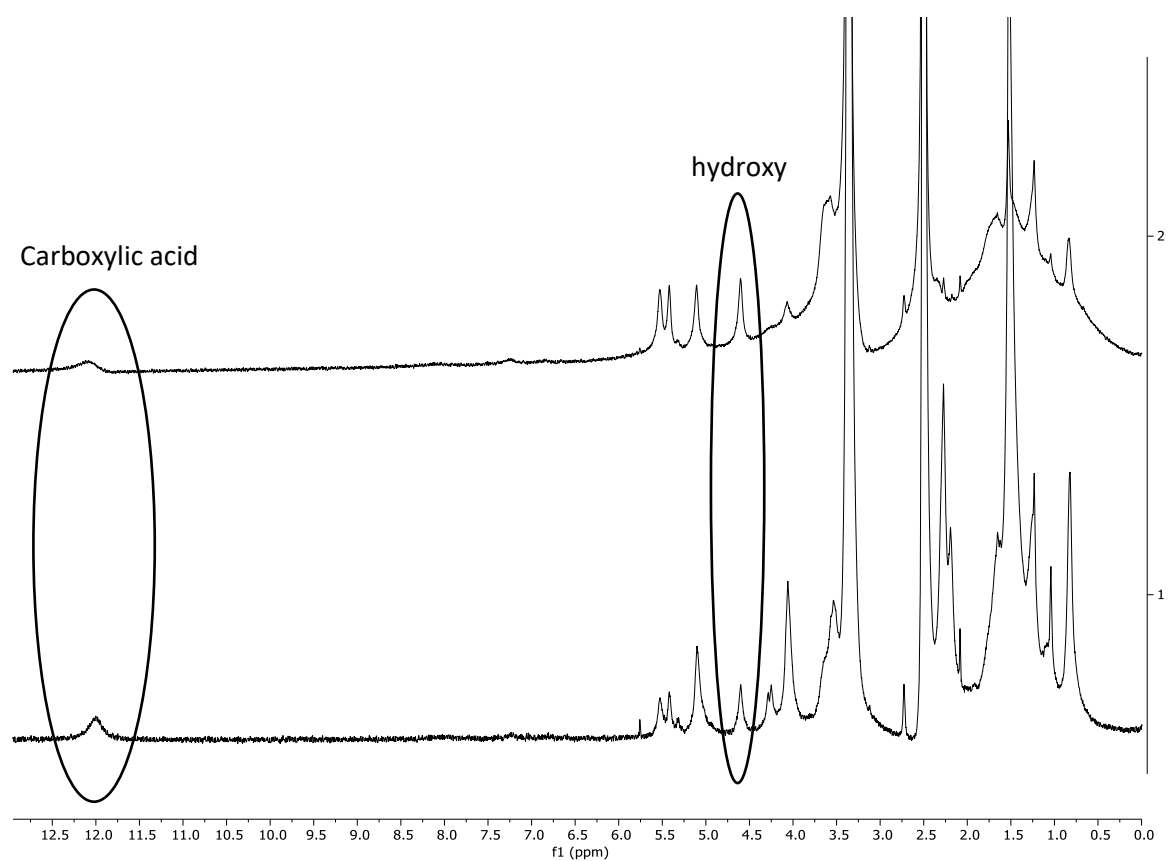

**Figure S24.**  $^1\text{H}$  NMR ( $\text{DMSO-}d_6$ ) spectra of the hydrolyzed products of P3 (below) and P4 (above) after enzymatic degradation

## II. LC-MS

### a. HBO-citro

$C_{15}H_{26}O_4$  (270.1831 g/mol)

271.1897 g/mol identified at 10 min

The theoretical mass of  $[M+H]^+$  is 271.1904 g/mol

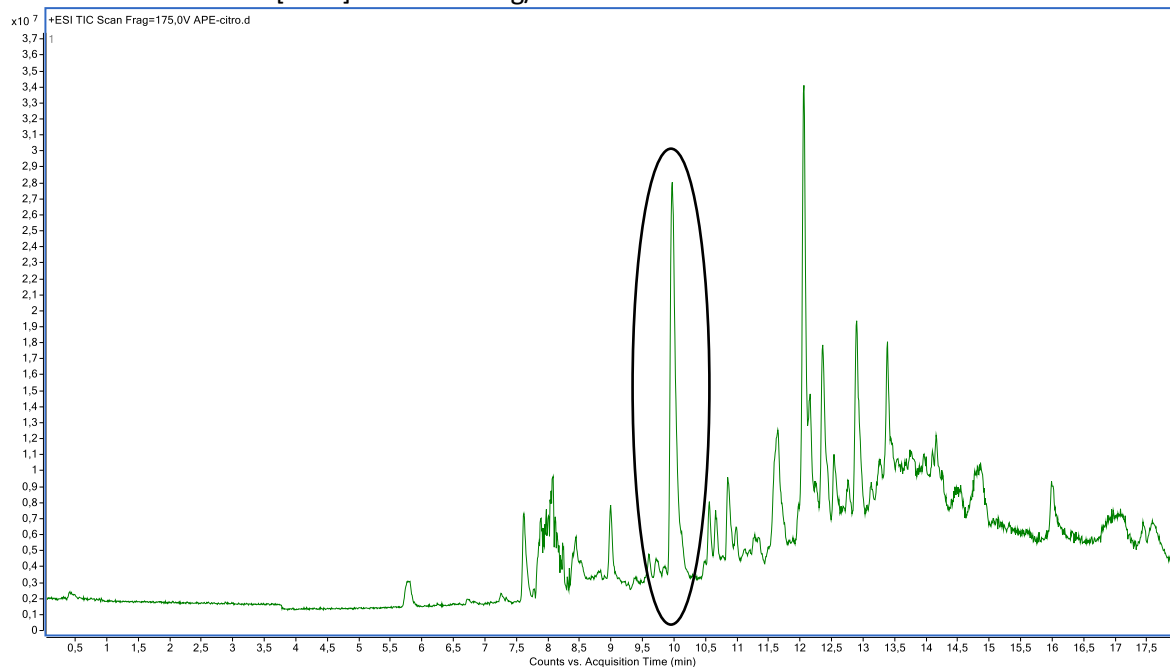

Figure S25. LC-MS chromatogram of HBO-citro

### b. Triol-citro

$C_{15}H_{30}O_4$  (274.2144 g/mol)

275.2213 g/mol identified at 8.6 min

The theoretical mass of  $[M+H]^+$  is 275.2217 g/mol

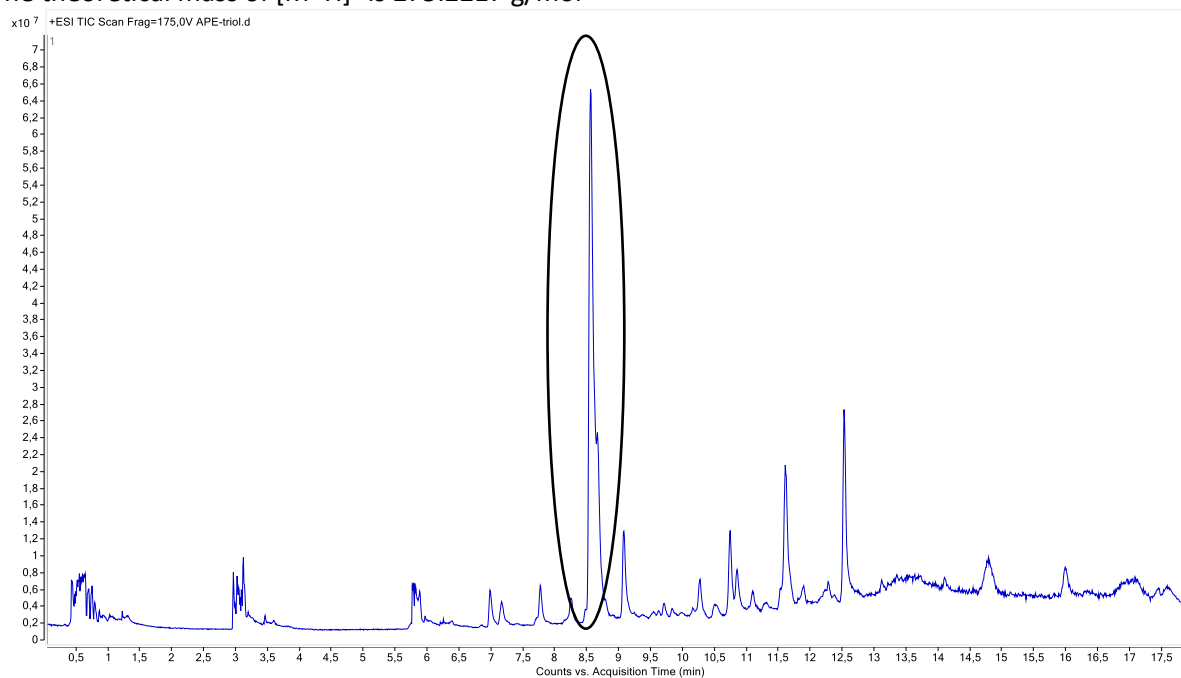

Figure S26. LC-MS chromatogram of Triol-citro



### III. SEC

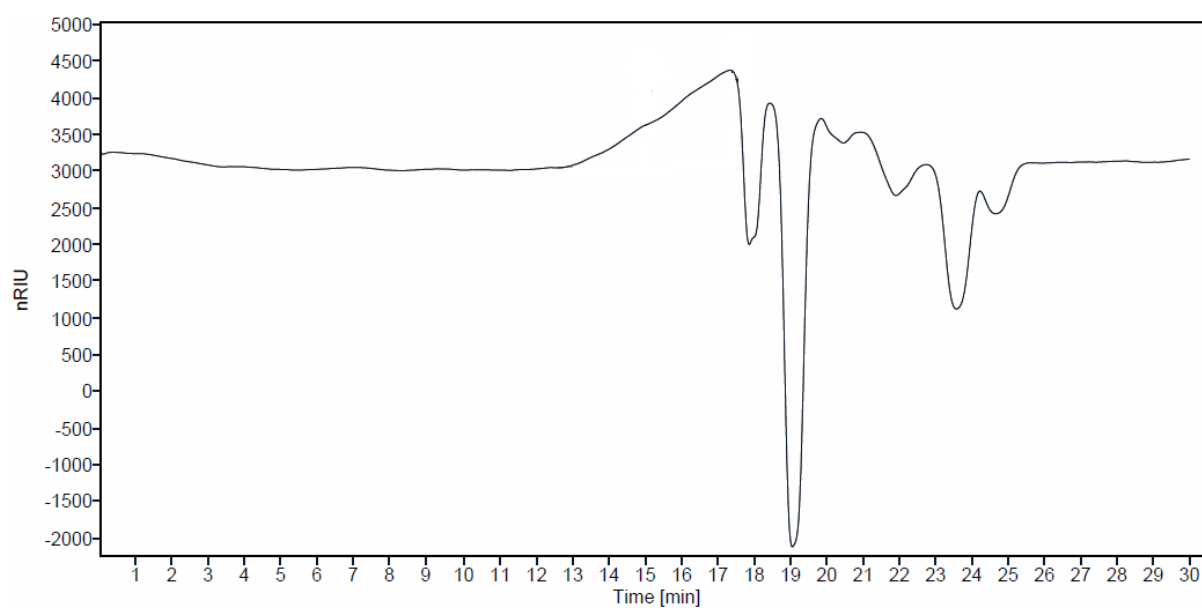

**Figure S27.** SEC trace of P1, Table 2

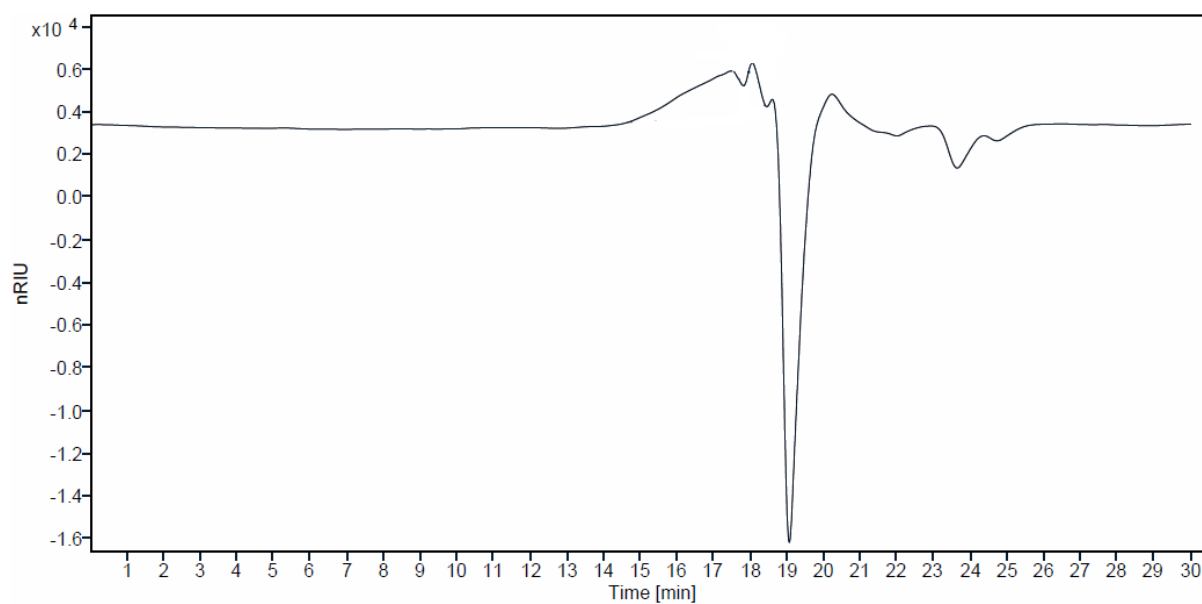

**Figure S28.** SEC trace of P2, Table 2

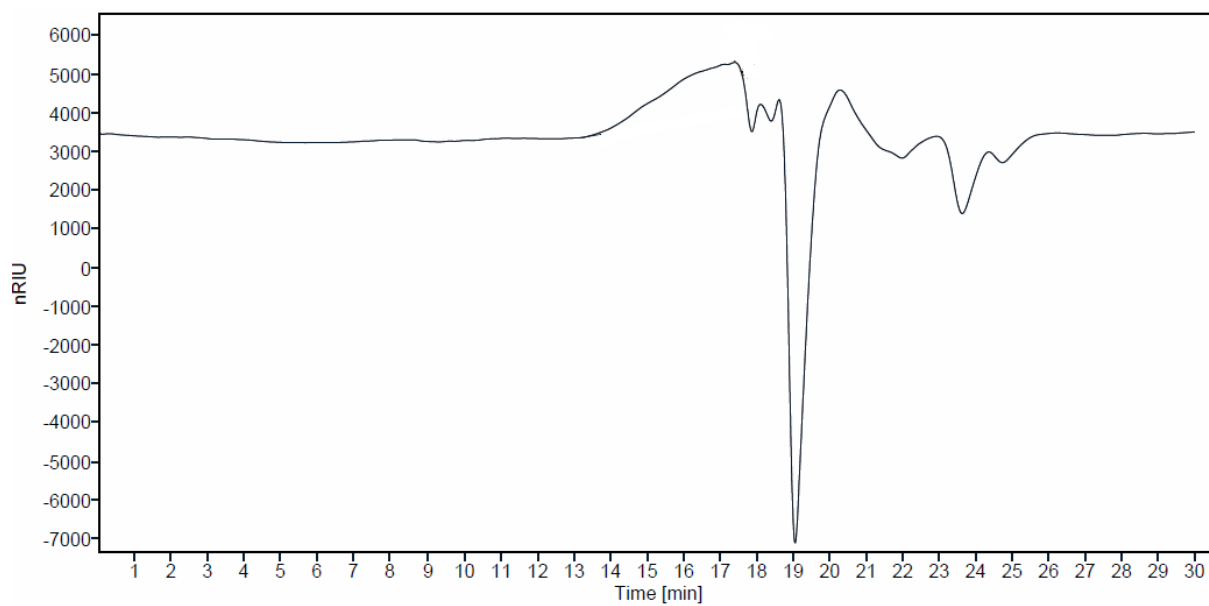

**Figure S29.** SEC trace of P3, Table 2

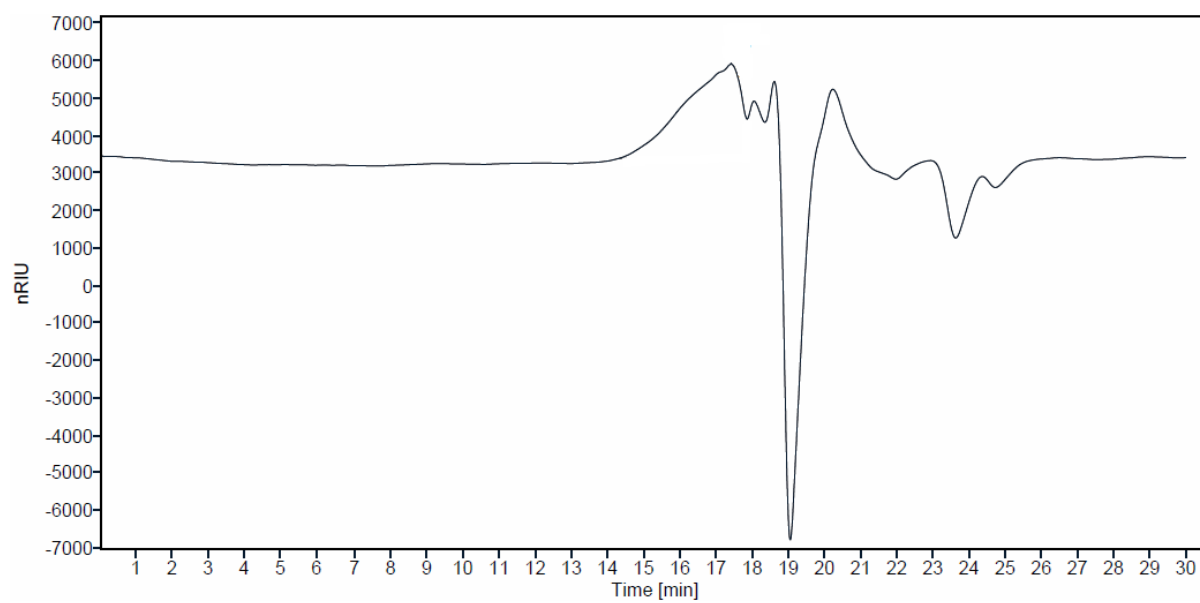

**Figure S30.** SEC trace of P4, Table 2

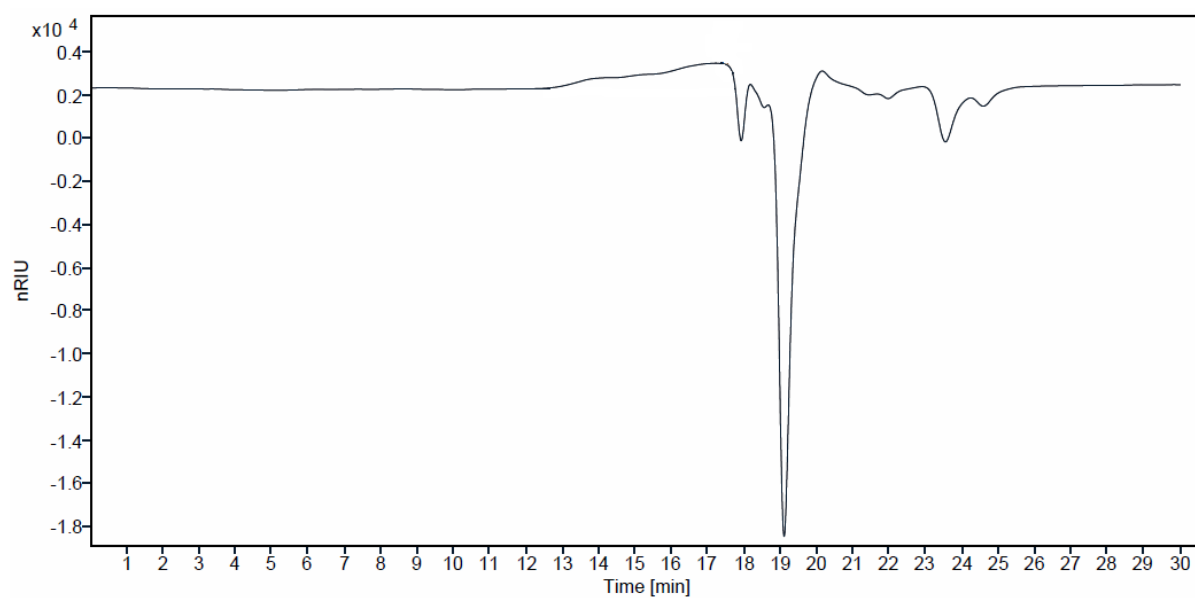

**Figure S31.** SEC trace of the resulting product of P1 (run 1, Table 2) after enzymatic degradation

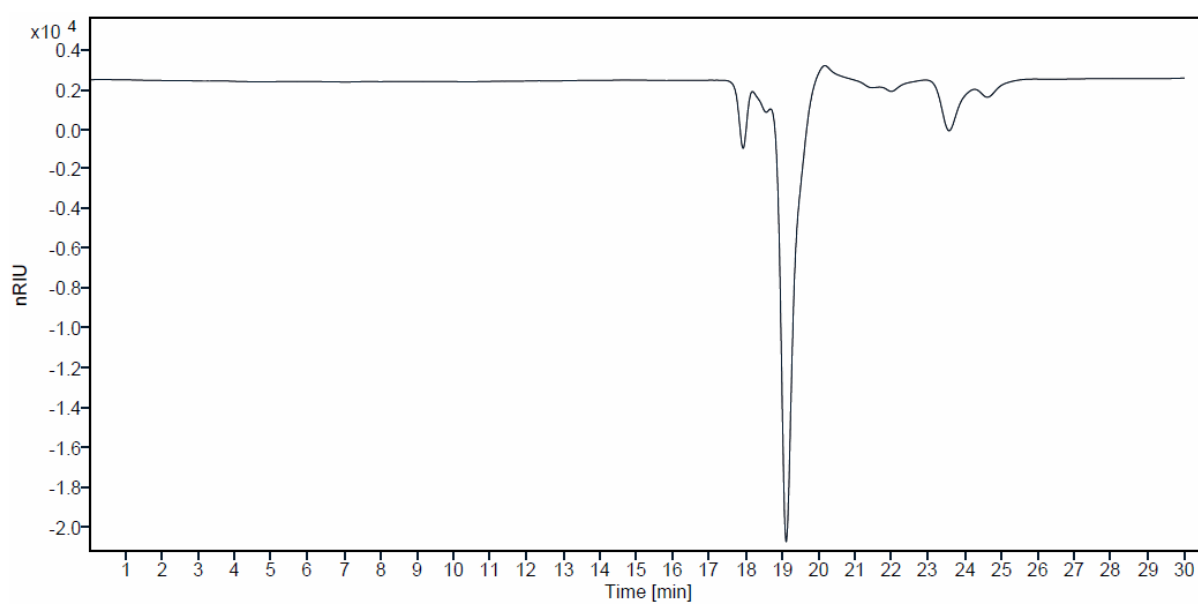

**Figure S32.** SEC trace of the resulting product of P2 (run 2, Table 2) after enzymatic degradation

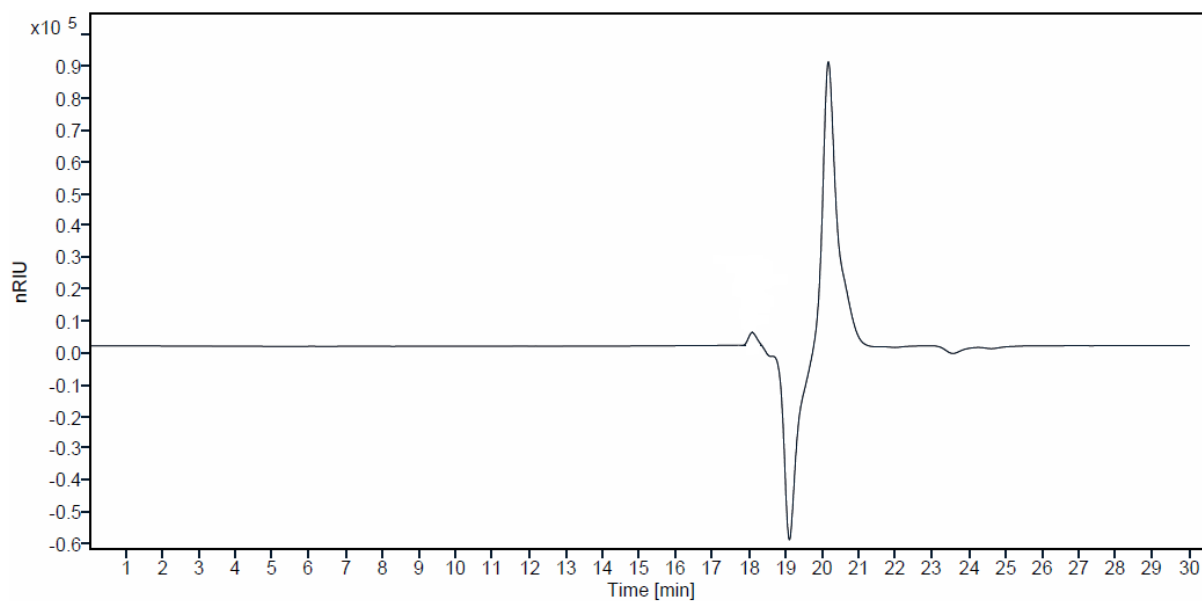

**Figure S33.** SEC trace of the resulting product of P3 (run 3, Table 2) after enzymatic degradation

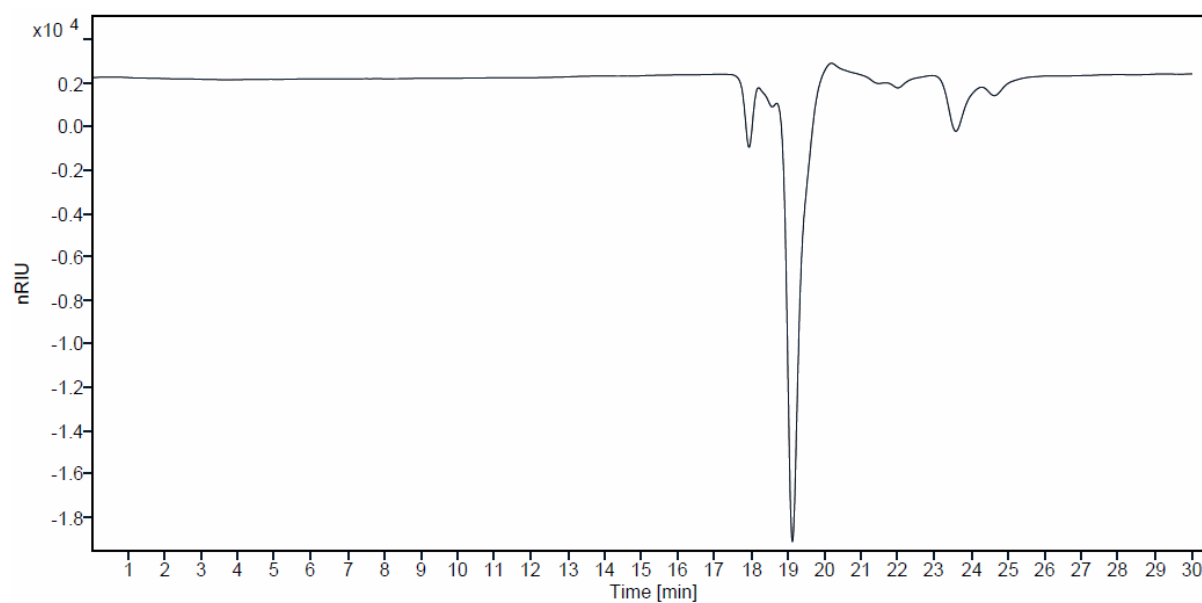

**Figure S34.** SEC trace of the resulting product of P4 (run 4, Table 2) after enzymatic degradation

#### IV. FTIR

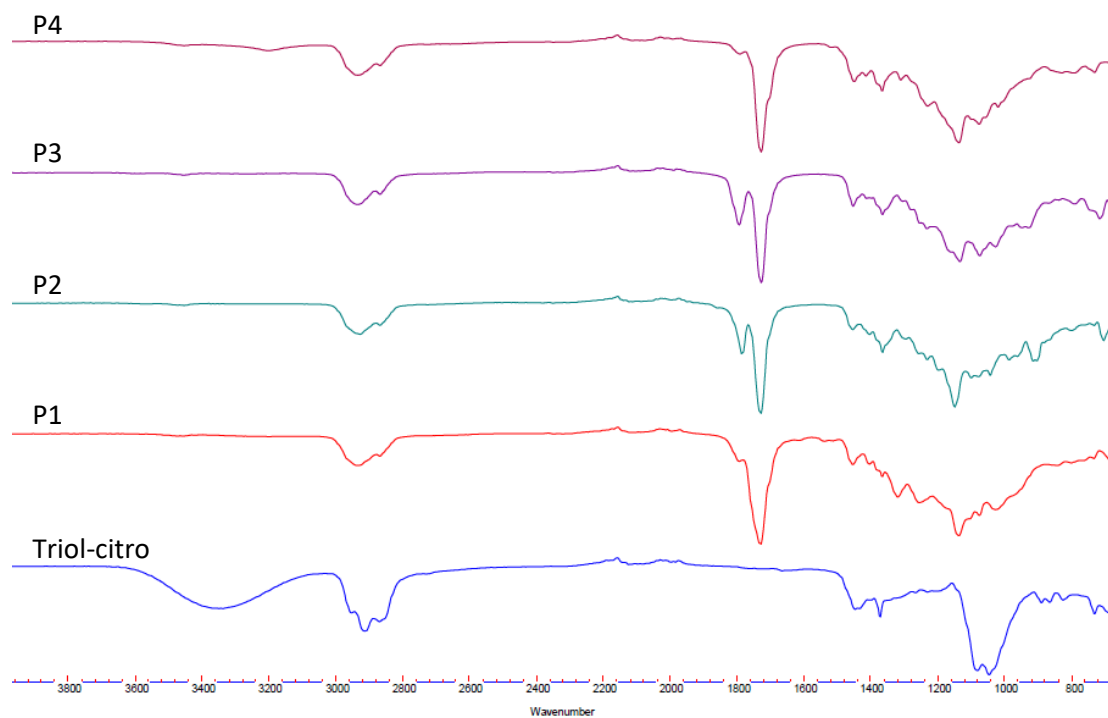

**Figure S35.** Typical FTIR spectra of P1-P4 (runs 1-4, Table 2)

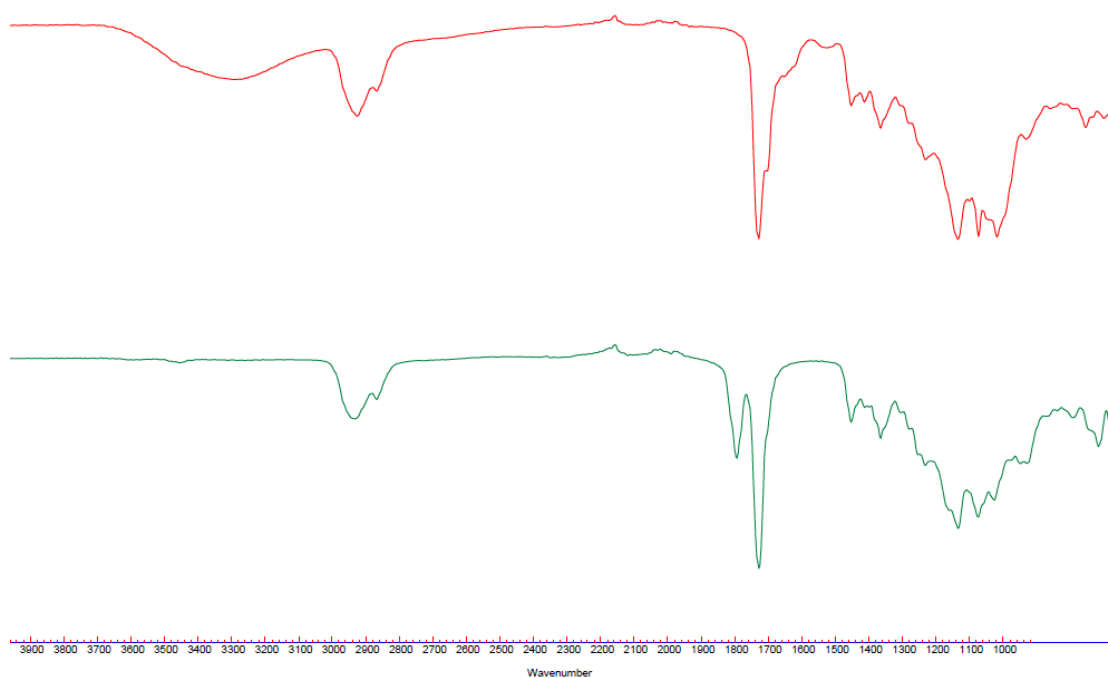

**Figure S36.** Typical FTIR spectra of P3 (taken as an example) before and after enzymatic degradation (before: green and after: red, respectively)

#### V. DSC

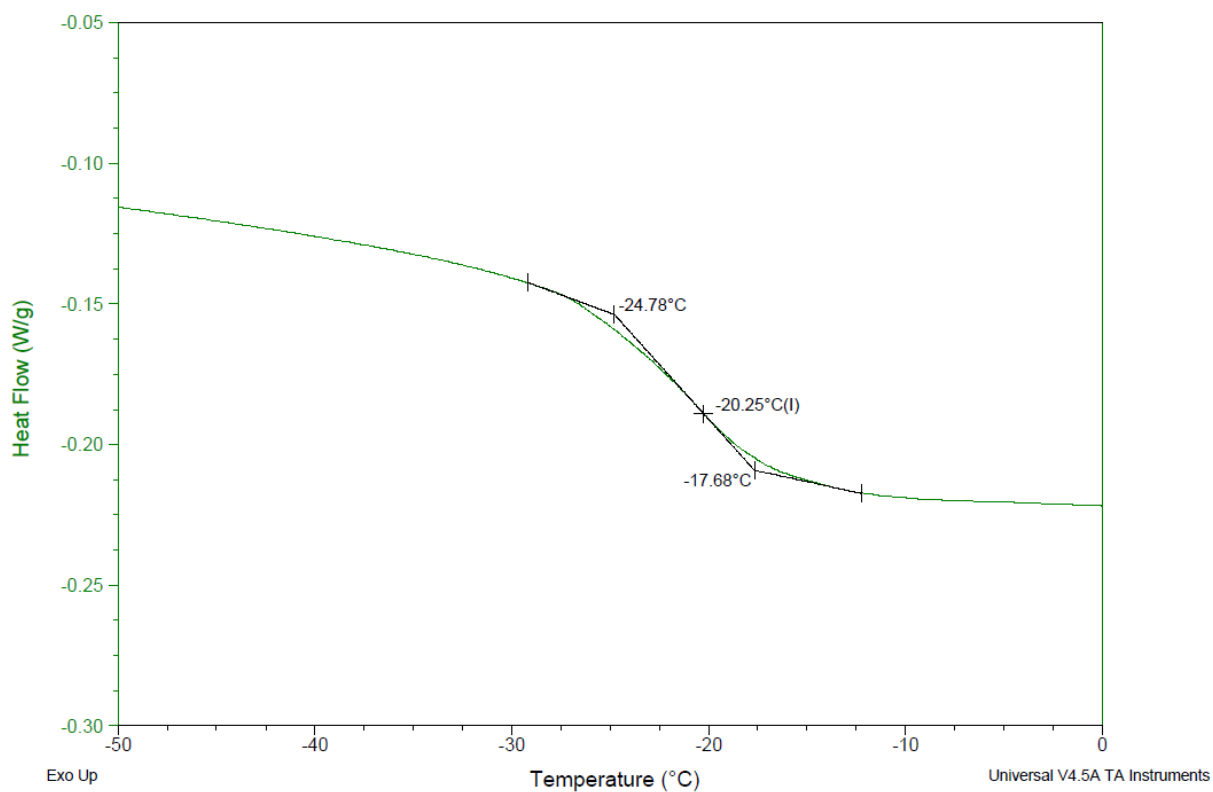

**Figure S37.** DSC thermogram (3<sup>rd</sup> heat cycle) of P1, run 1, Table 2

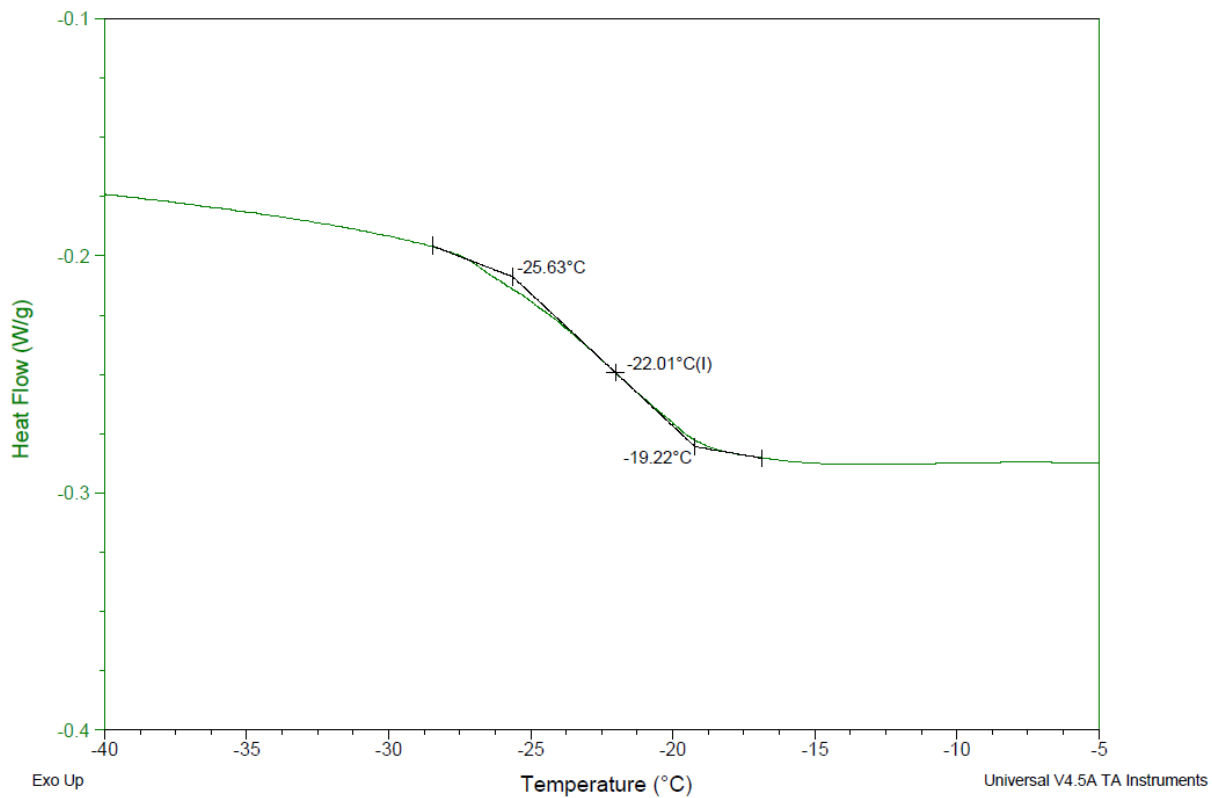

**Figure S38.** DSC thermogram (3<sup>rd</sup> heat cycle) of P2, run 2, Table 2

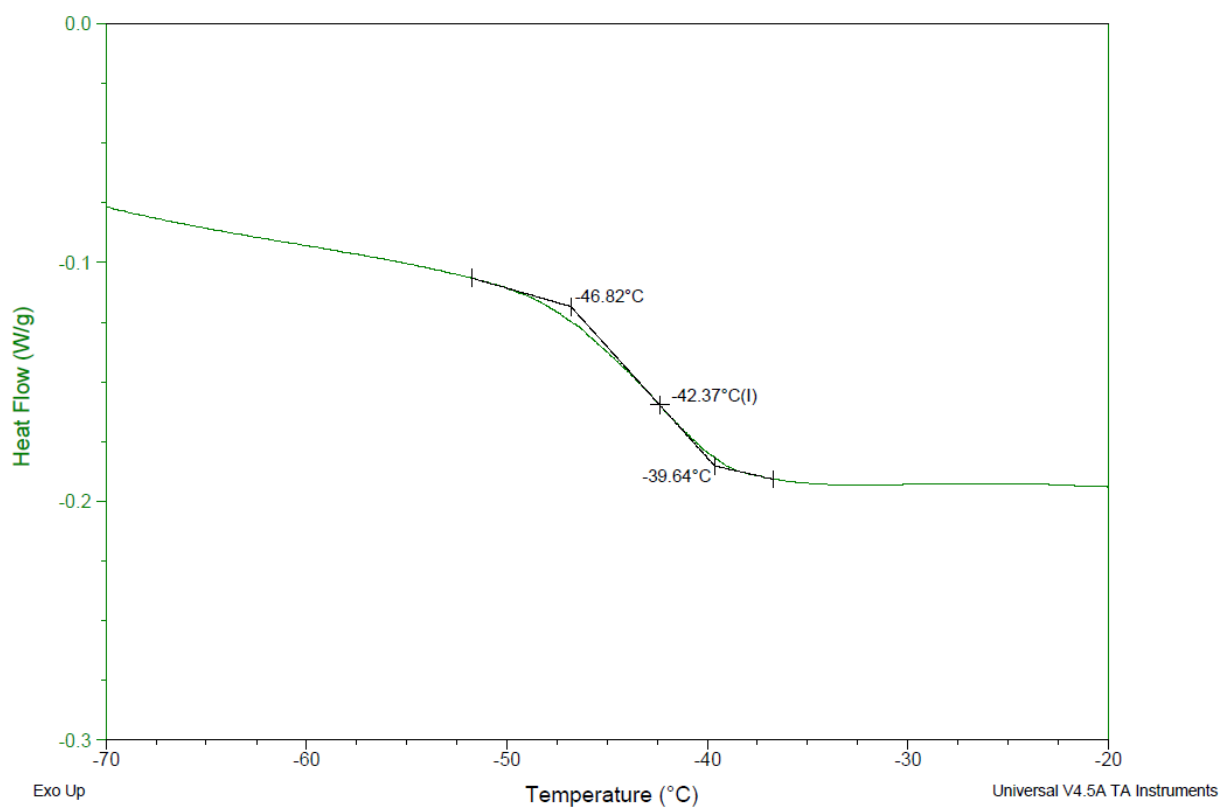

**Figure S39.** DSC thermogram (3<sup>rd</sup> heat cycle) of P3, run 3, Table 2

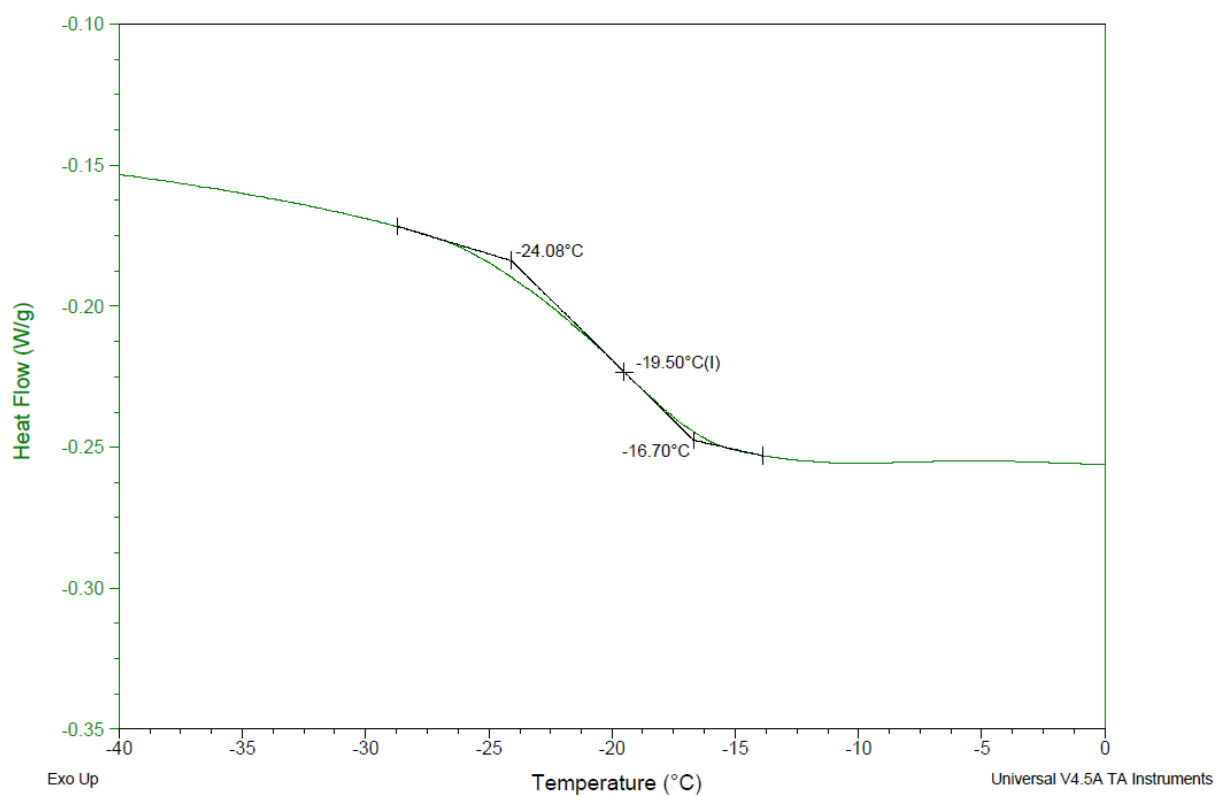

**Figure S40.** DSC thermogram (3<sup>rd</sup> heat cycle) of P4, run 4, Table 2

## VI. TGA

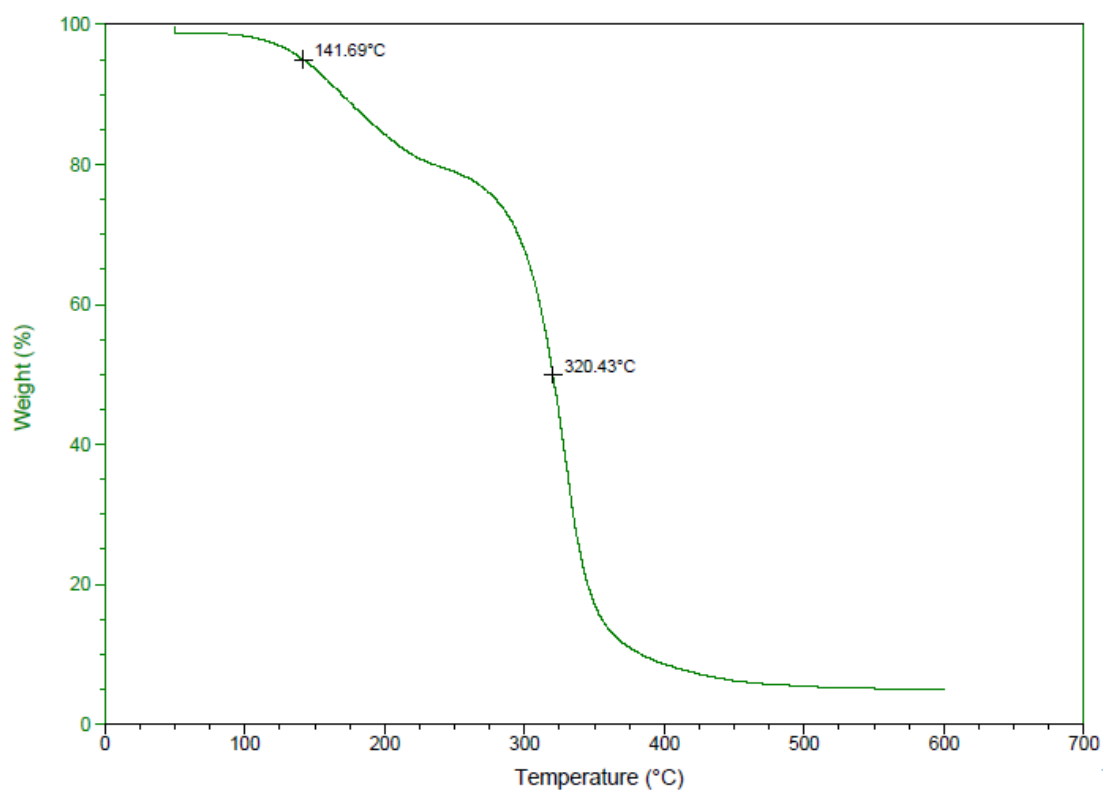

**Figure S41.** TGA thermogram of P1, run 1, Table 2

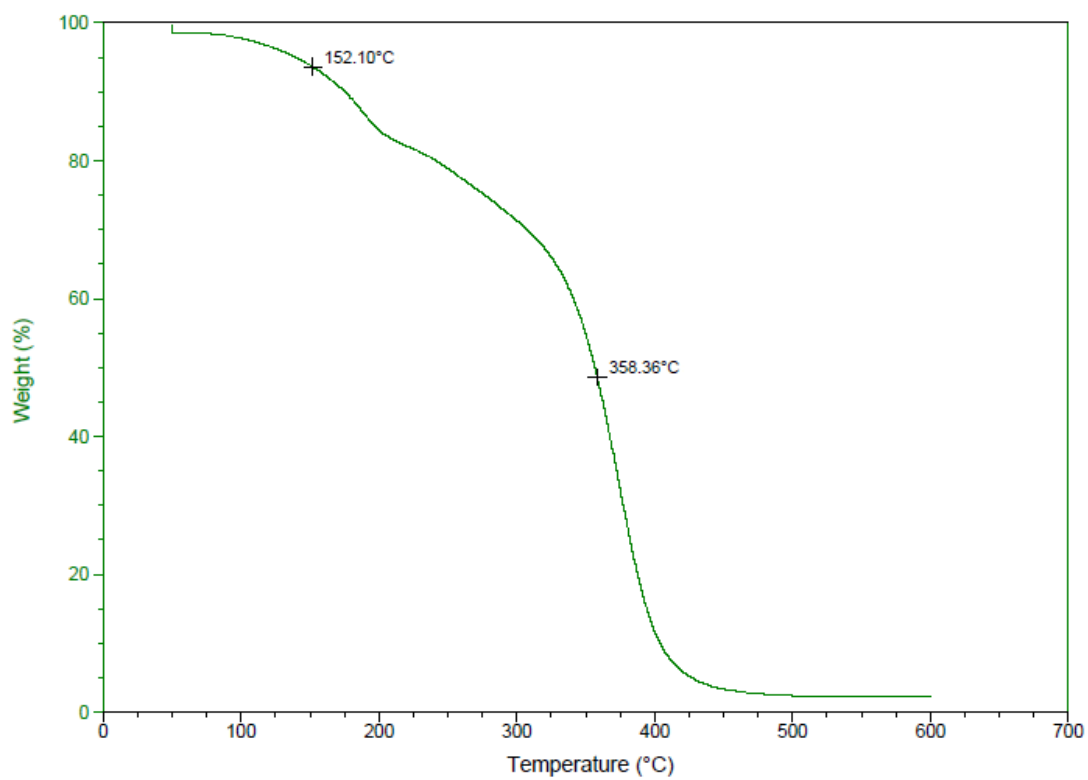

**Figure S42.** TGA thermogram of P2, run 2, Table 2



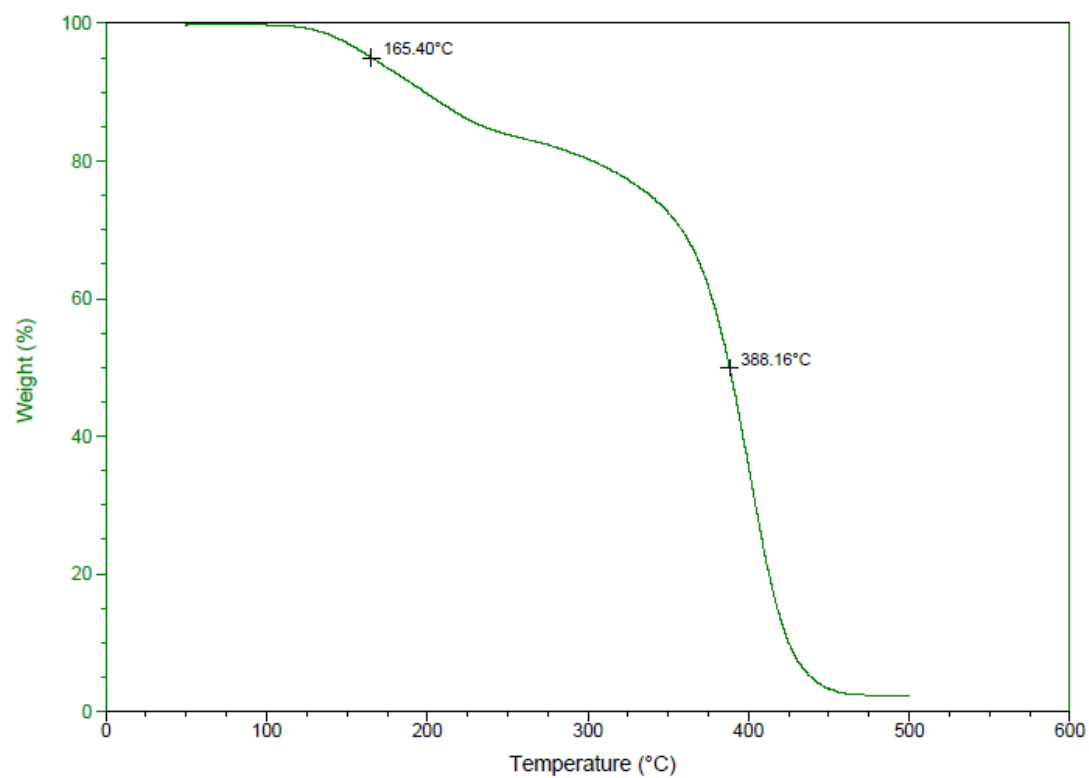

**Figure S43.** TGA thermogram of P3, run 3, Table 2

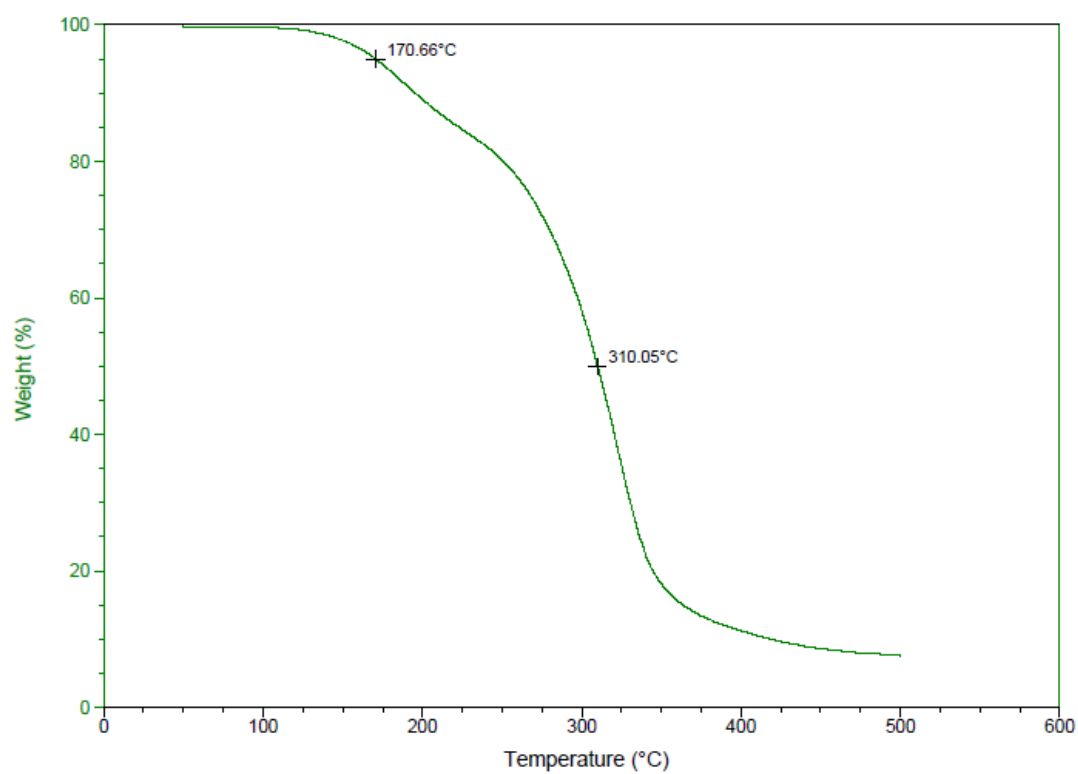

**Figure S44.** TGA thermogram of P4, run 4, Table 2
